# Supplementary material for: Neocortical Localization and Thalamocortical Modulation of Neuronal Hyperexcitability in Fragile X Syndrome
Source: bioRxiv or medRxiv preprint supplement (doi:10.1101/2021.05.12.21256925), 2022-02-21
Supplement: Supplementary file [file media-1.pdf]

## **Neocortical Localization and Thalamocortical Modulation of Neuronal Hyperexcitability in Fragile X Syndrome**

**Authors:** Ernest V Pedapati<sup>1,2,3\*</sup>, Lauren M. Schmitt<sup>4,8</sup>, Rui Liu<sup>1</sup>, Lauren E. Ethridge<sup>5,6</sup>, Elizabeth Smith<sup>7,8</sup>, John A Sweeney<sup>3</sup>, Rebecca C. Shafter<sup>4,8</sup>, Kelli C. Dominick<sup>1,3</sup>, Donald L. Gilbert<sup>2,8</sup>, Steve W. Wu<sup>2,8</sup>, Paul S. Horn<sup>2</sup>, Devin Binder<sup>9</sup>, Martine Lamy<sup>1,3</sup>, Megan Axford<sup>1</sup>, Makoto Miyakoshi<sup>10</sup>, and Craig A. Erickson<sup>1,3</sup>

### **Supplementary Materials**

### *Supplemental Figures*

Figure S1. Group Contrasts of Relative power of Scalp EEG by Frequency Band

Figure S2. Subject level distribution of significant relative power differences by group and frequency band

Figure S3. Group Differences in Resting State Networks

Figure S4. Sex and Group Differences in Cortical Regions by Frequency Bands

Figure S5. Obligate mosaicism present in Fmr1 in females with FXS may attenuate elevated gamma power observed in males with FXS.

### *Supplemental Tables*

Table S1. Additional Clinical Characteristics by Group

Table S2. Alterations in relative power are significantly correlated with disease relevant clinical measures.

Table S3. DK Atlas Nodal Group Comparison

Table S4. Regional sex and group differences in source-localized relative power by frequency band.

Table S5. Mean Alpha Shift (alpha1/alpha2 power) by group and sex.

Table S6. Differences in alpha shift across cortical regions by group and sex.

Table S7. Statistical comparison of FXS-TDC differences in alpha shift between regions

Clinical Correlations of Cognitive and Sensory Resting State Networks

Cognitive Network Clinical Correlations

Table S9. Default Mode Network

Table S10. Dorsal Attention Network

Table S11. Salience Network

Sensory Network Clinical Correlations

Table S12. Auditory Network

Table S13. Visual Network

Table S14. Resting state networks and their cortical nodes as attributed in the Desikan-Killiany (DK) atlas.

Table S15. Regional classification of DK Atlas Nodes

## Supplementary Materials:

### Figure S1. Group Contrasts of Relative power of Scalp EEG by Frequency Band

Group level t-maps (5% FDR-corrected) of scalp EEG comparisons between FXS (n=70) and TDC (n=71) by frequency band. Participants with FXS showed markedly increased power in mid-frontal theta activity predominantly and increased gamma1 and gamma2 activity in electrodes over the temporal and posterior regions. Alpha1 and alpha2 power was widely diminished in FXS across frontal and posterior electrodes. As findings across scalp EEG remain spatially ambiguous<sup>79</sup>, the findings were primarily used to generate hypotheses and assess for frequency specific trends across groups. Warmer colors indicate significant FXS>TDC, cooler colors indicate significant FXS<TDC, and gray areas indicate non-significant group differences.

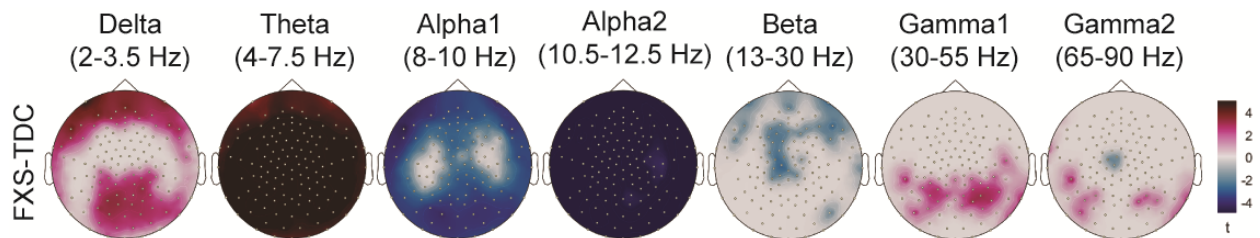

**Figure S2. Subject level distribution of significant relative power differences by group and frequency band**

Group level boxplots (A-C) displaying median and interquartile range of relative power by frequency band for each significant region of interest from **Figure 1 (B)**. Frequency bands are split into subplots to optimize scale. Scatter plots of subject level data are superimposed on boxplots. D. Tabular view of mean relative power ( $\pm$  standard deviation) for each group by frequency band. FXS, Fragile X Syndrome; TDC, Typically Developing Controls.

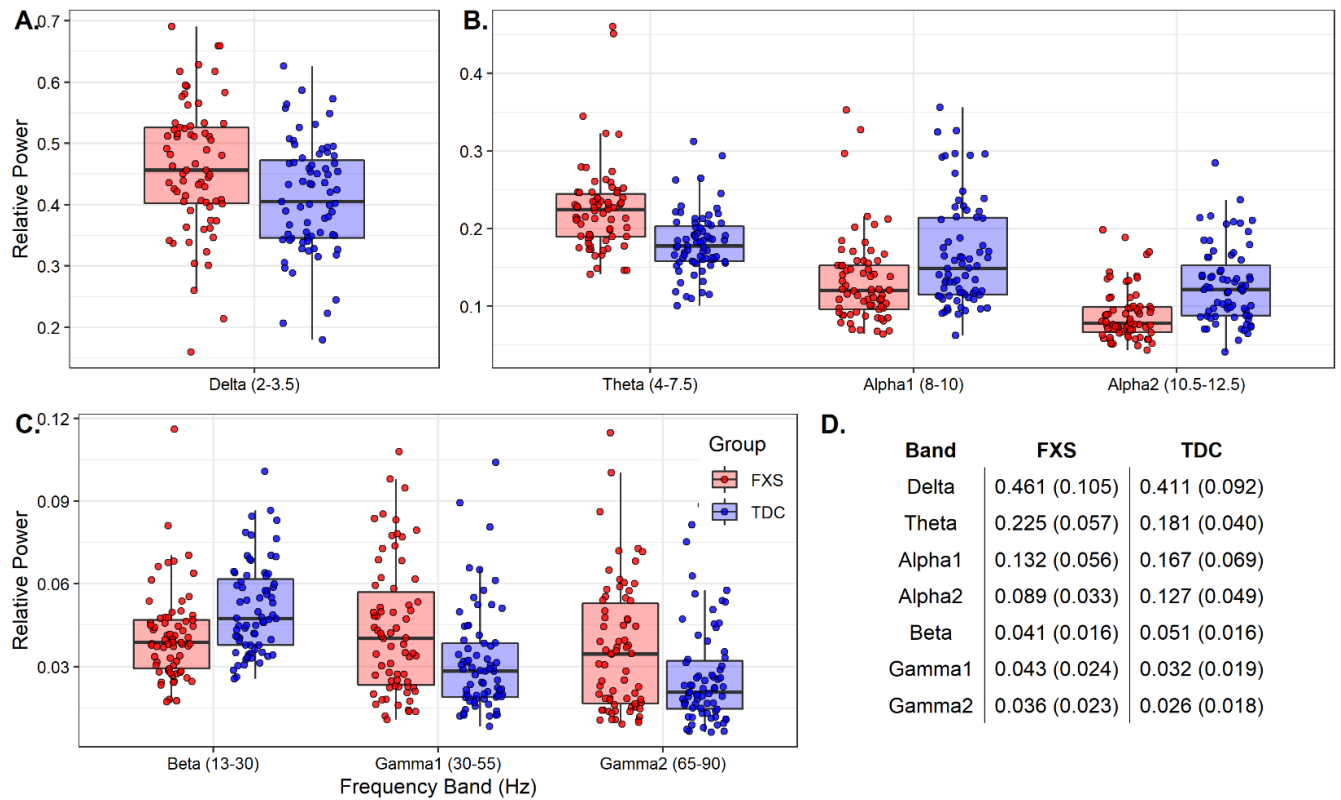

### **Figure S3. Group Differences in Resting State Networks**

Group-level, frequency-specific t-maps depicting significant FXS vs. TDC differences in nodal relative power in resting-state networks (RSN). Gray indicates contrast is non-significant. DMN, default mode network; DAN, dorsal attention network; SAN, salient affective network; VIS, visual attention network; AUD, auditory network. Significant contrasts ( $p < .05$ , FDR corrected) are displayed with warmer colors indicating FXS > TDC and cool colors indicating FXS < TDC, with size of node proportional to absolute t-value.

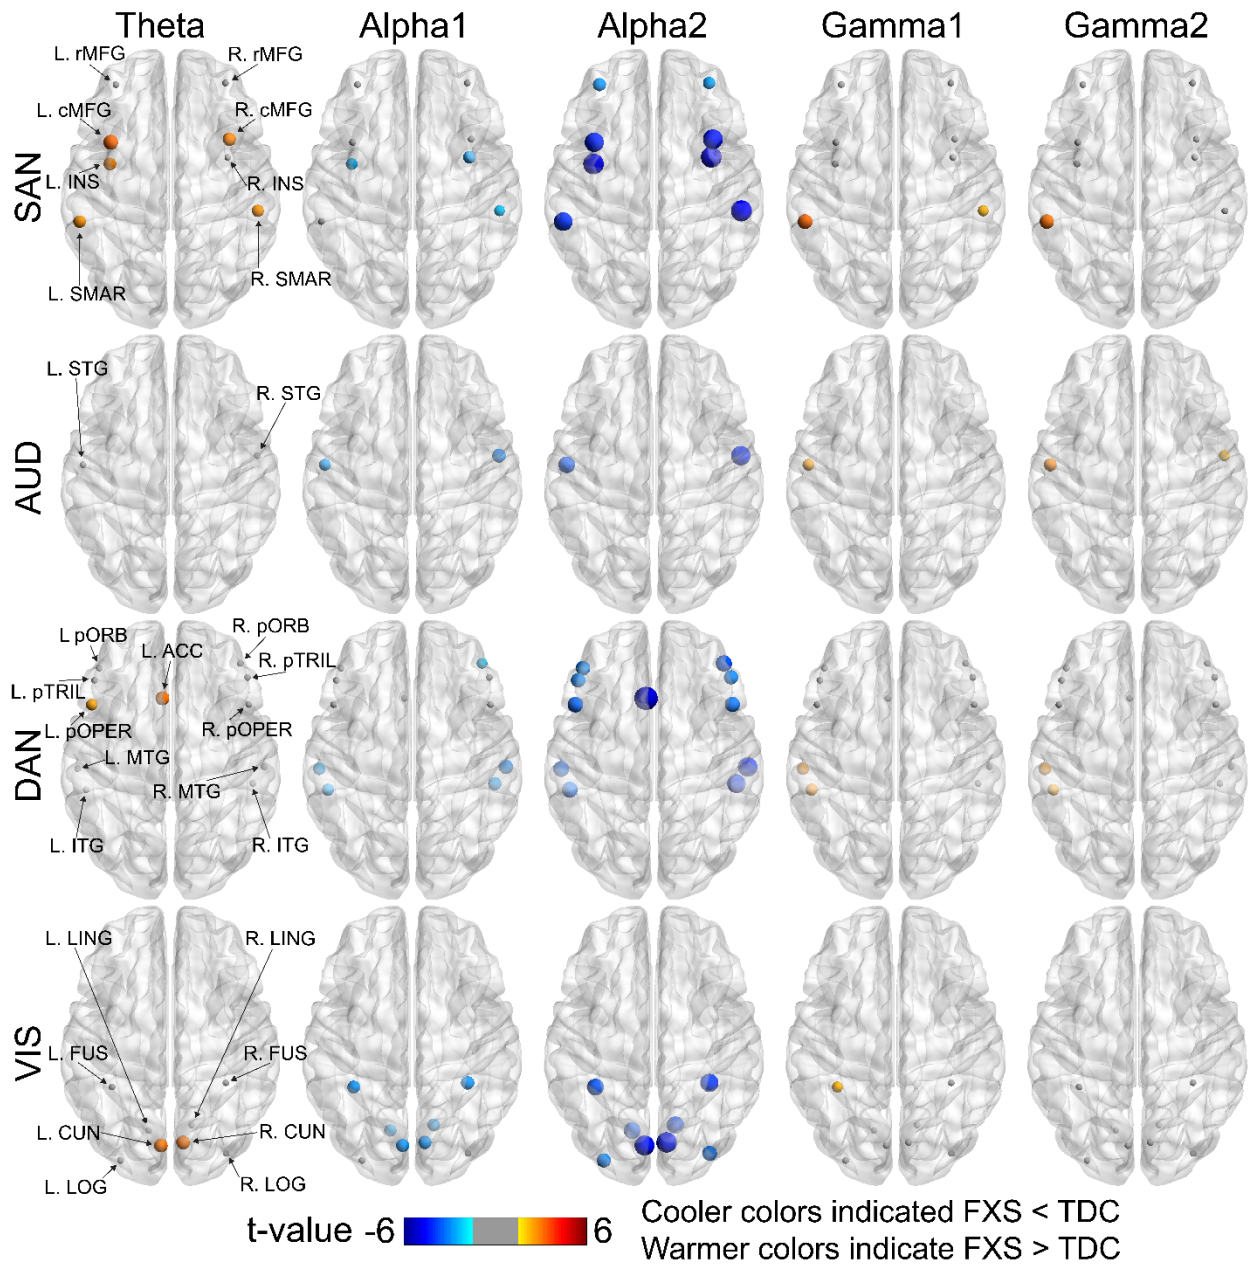

### Figure S4. Sex and Group Differences in Cortical Regions by Frequency Band

Estimated differences in log relative power per cortical region by frequency band with each subplot depicting within and between group sex differences. Estimates represent LSMeans  $\pm$  SEM of a significant fourth order interaction between from a linear mixed effect model assessing variation in log relative power among group, sex, cortical region, and frequency band factors with the random effect as subject ( $n=141$ ),  $F_{24,66839}=3.94$ ,  $p < 1 \times 10^{-4}$ . FDR adjusted significant contrasts indicated with asterisks (\*,  $p < .05$ ; \*\*,  $p < .001$ ; \*\*\*,  $p < 1 \times 10^{-5}$ ). See table S15 for description of nodes within each region.

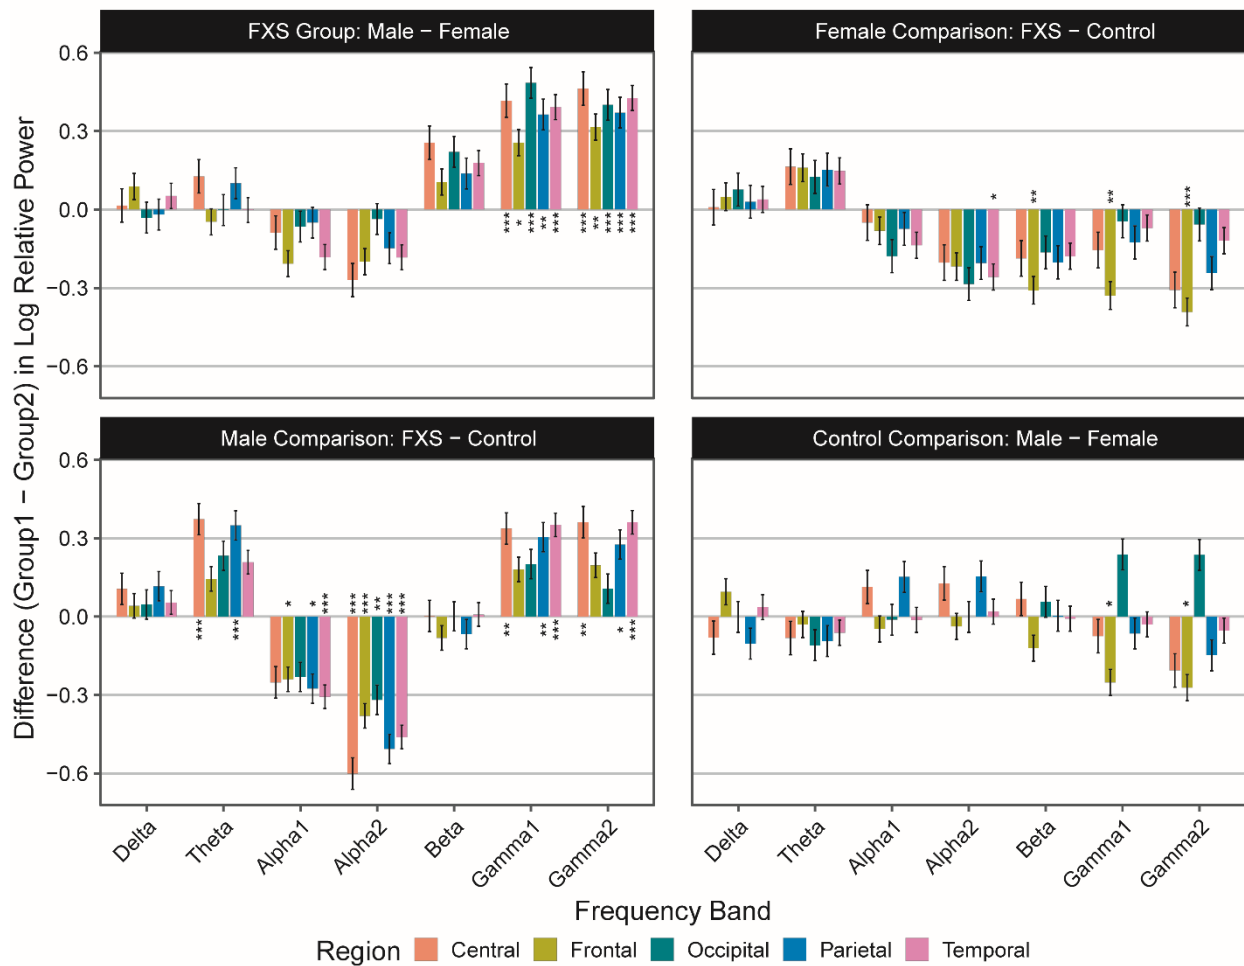

**Figure S5. Obligate mosaicism present in Fmr1 in females with FXS may attenuate elevated gamma power observed in males with FXS.**

Bar plots depicting group-level difference (mean  $\pm$  standard error) of FXS males - FXS females of log-normalized relative power of functional resting state networks (RSNs) calculated from least-square mean estimates. Full statistical model controls for sex differences with the inclusion of age- and gender-matched controls and subject as a random effect. Black outlined bars indicate frequency band and network pair differences are statistically significant (\*,  $p < .05$ ; \*\*,  $p < .001$ , \*\*\*,  $p < 1 \times 10^{-5}$ ; FDR corrected) and gray outlined bars did not reach statistical significance. DMN, default mode network; DAN, dorsal attention network; SAN, salient affective network; VIS, visual attention network; AUD, auditory network. Per each frequency band, significant positive estimates indicate greater relative power in FXS males and significant negative estimates indicate greater power in FXS females.

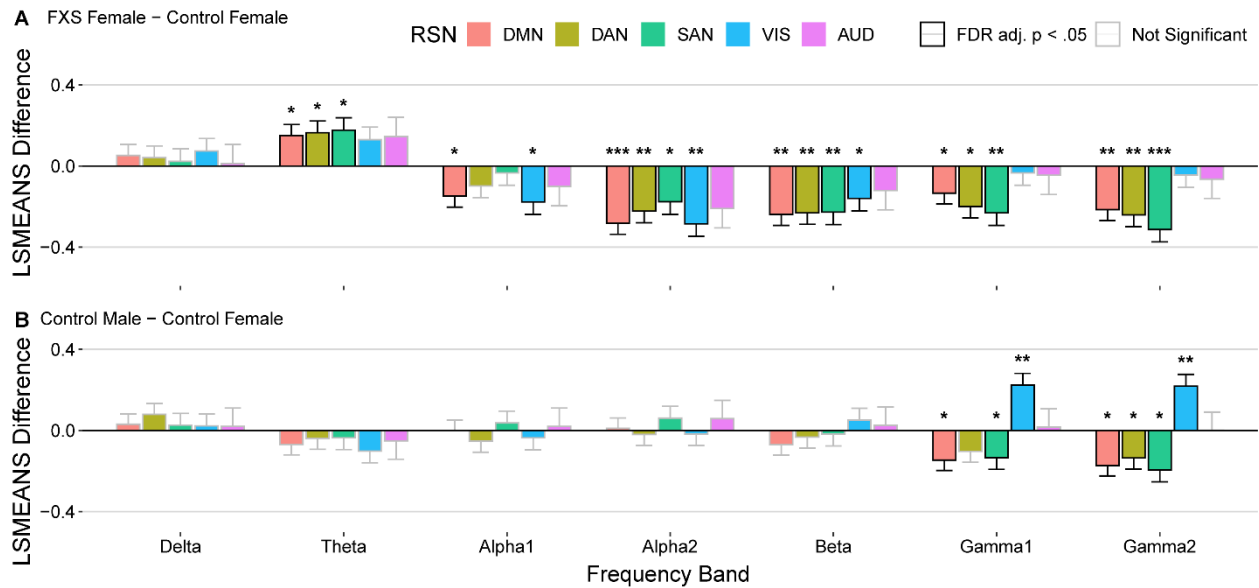



Supplemental Tables

**Table S1: Additional Clinical Characteristics by Group**

Comparison of detailed demographic and clinical features of EEG dataset by group. FSIQ, Full Scale IQ, NVIQ, Non-verbal intelligence scale; VIQ, verbal intelligence scale; SCQ, Social Communication Questionnaire; WJ-3, Woodcock III Tests of Cognitive Abilities; ADAMS, Anxiety, Depression, and Mood Scale; t, t-statistic following independent Student t-tests; p, unadjusted significance; adj. p, p-value following Bonferroni correction.

| Measure       | FXS (n=70)  | TDC (n=71)  | t     | p     | adj. p. |
|---------------|-------------|-------------|-------|-------|---------|
| Age (Years)   | 20.5+/-10.0 | 22.2+/-10.7 | <.001 | .35   | .70     |
| Sex (Female)  | F: 32 M: 38 | F: 30 M: 41 | .17   | .72   | .72     |
| FSIQ          | 49.5+/-30.2 | 103.2+/-9.2 | <.001 | <.001 | <.001   |
| SCQ           | 13.6+/-7.7  | 2.1+/-2.2   | 9.94  | <.001 | <.001   |
| WJ-III        | 67.8+/-15.7 | 94.1+/-12.1 | <.001 | <.001 | <.001   |
| ADAMS-Anxiety | 7.2+/-5.0   | 2.1+/-2.6   | 6.37  | <.001 | <.001   |
| ADAMS-OCD     | 2.3+/-2.5   | .4+/-1.1    | 5.12  | <.001 | <.001   |

**Table S2: Alterations in relative power are significantly correlated with disease relevant clinical measures.**

For each subject, mean relative power by frequency band was computed from cortical envelope regions representing significant FXS-TDC differences (**see Figure 1**). A: Spearman correlation of all FXS subjects. All possible correlations were 5% FDR corrected and surviving correlations were adjusted for age.

| A.     | Frequency | Measure           | Spearman's rho |        |       | Age-adjusted |        | n  |
|--------|-----------|-------------------|----------------|--------|-------|--------------|--------|----|
|        |           |                   | rho            | p      | FDR p | rho          | p      |    |
| alpha1 |           | Age (Years)       | .46            | <0.001 | 0.002 |              |        | 70 |
|        |           | ADAMS-OCD         | -.43           | <0.001 | 0.006 | -.42         | <0.001 | 64 |
|        |           | ABC-Hyperactivity | -.40           | 0.001  | 0.018 | -.31         | 0.016  | 61 |
| alpha2 |           | Age (Years)       | .31            | 0.009  | 0.045 |              |        | 70 |
|        |           | SCQ               | -.34           | 0.007  | 0.043 | -.33         | 0.010  | 62 |
|        |           | ADAMS-OCD         | -.46           | <0.001 | 0.004 | -.43         | <0.001 | 64 |
|        |           | ABC-Stereotypy    | -.34           | 0.008  | 0.045 | -.29         | 0.023  | 61 |
|        |           | ABC-Irritability  | -.35           | 0.006  | 0.043 | -.28         | 0.027  | 61 |
| gamma1 |           | Age (Years)       | .33            | 0.005  | 0.043 |              |        | 70 |
|        |           | NVIQ              | -.40           | 0.001  | 0.017 | -.27         | 0.028  | 64 |
|        |           | ABC-Hyperactivity | -.34           | 0.006  | 0.043 | -.30         | 0.018  | 61 |
| gamma2 |           | Age (Years)       | .31            | 0.008  | 0.045 |              |        | 70 |
|        |           | NVIQ              | -.35           | 0.005  | 0.043 | -.21         | 0.096  | 64 |

**Table S3: DK Atlas Nodal Group Comparison**

Significant (FDR corrected  $p < 0.05$ ) mean differences between FXS participants and controls of nodal log relative power by frequency band. Estimate (Est.) represents FXS – TDC (positive values indicate FXS > TDC). MNI coordinates indicate the centroid position of the region of interest. Abbreviations: L, Left; R, Right; C, Central; L, Lingula; P, Parietal; T, Temporal; t, t-value; PF, prefrontal; MNI, Montreal Neurological Institute template X, Y, Z coordinates; STS, superior temporal sulcus.

| Frequency | Side | Region | Node                  | MNI |     |    | tValue | Est. | FDR p   |
|-----------|------|--------|-----------------------|-----|-----|----|--------|------|---------|
|           |      |        |                       | X   | Y   | Z  |        |      |         |
| theta     | L    | LC     | paracentral           | -7  | -30 | 57 | 4.2    | .33  | 4.7e-04 |
|           | R    | RC     | paracentral           | 7   | -27 | 57 | 4.1    | .33  | 5.8e-04 |
|           | L    | LL     | posterior cingulate   | -5  | -15 | 38 | 4.1    | .32  | 6.6e-04 |
|           | R    | RL     | posterior cingulate   | 5   | -17 | 39 | 4.1    | .32  | 7.0e-04 |
|           | R    | RP     | precuneus             | 10  | -58 | 38 | 3.9    | .31  | 1.2e-03 |
|           | L    | LP     | precuneus             | -9  | -59 | 38 | 3.9    | .31  | 1.3e-03 |
|           | R    | RL     | isthmus cingulate     | 6   | -42 | 19 | 3.8    | .30  | 1.8e-03 |
|           | L    | LL     | isthmus cingulate     | -7  | -45 | 18 | 3.7    | .29  | 2.1e-03 |
|           | R    | RP     | superior parietal     | 24  | -65 | 51 | 3.6    | .29  | 2.6e-03 |
|           | L    | LP     | superior parietal     | -23 | -65 | 50 | 3.6    | .29  | 2.8e-03 |
|           | L    | LC     | precentral            | -41 | -9  | 46 | 3.4    | .27  | 4.5e-03 |
|           | L    | LC     | postcentral           | -46 | -22 | 45 | 3.3    | .26  | 6.5e-03 |
|           | L    | LF     | caudal middle frontal | -37 | 11  | 47 | 3.3    | .26  | 6.5e-03 |
|           | R    | RC     | precentral            | 40  | -7  | 46 | 3.1    | .25  | 1.1e-02 |

| Frequency | Side | Region | Node                      | MNI |     |     | tValue | Est. | FDR p   |
|-----------|------|--------|---------------------------|-----|-----|-----|--------|------|---------|
|           |      |        |                           | X   | Y   | Z   |        |      |         |
|           | L    | LL     | caudal anterior cingulate | -5  | 21  | 26  | 3.1    | .24  | 1.1e-02 |
|           | R    | RO     | cuneus                    | 8   | -78 | 20  | 3.1    | .24  | 1.1e-02 |
|           | L    | LO     | cuneus                    | -6  | -80 | 19  | 3.1    | .24  | 1.1e-02 |
|           | R    | RL     | caudal anterior cingulate | 4   | 22  | 27  | 3.0    | .24  | 1.2e-02 |
|           | R    | RC     | postcentral               | 44  | -20 | 46  | 3.0    | .24  | 1.3e-02 |
|           | L    | LP     | inferior parietal         | -42 | -71 | 32  | 3.0    | .24  | 1.3e-02 |
|           | R    | RF     | caudal middle frontal     | 37  | 13  | 48  | 3.0    | .24  | 1.4e-02 |
|           | R    | RP     | inferior parietal         | 46  | -63 | 32  | 2.9    | .23  | 1.6e-02 |
|           | L    | LT     | insula                    | -38 | -2  | 2   | 2.9    | .23  | 1.7e-02 |
|           | L    | LP     | supramarginal             | -57 | -38 | 34  | 2.8    | .22  | 2.0e-02 |
|           | L    | LF     | superior frontal          | -12 | 30  | 41  | 2.8    | .22  | 2.2e-02 |
|           | R    | RP     | supramarginal             | 54  | -31 | 36  | 2.7    | .22  | 2.3e-02 |
|           | L    | LT     | transverse temporal       | -46 | -23 | 10  | 2.7    | .21  | 2.5e-02 |
|           | R    | RF     | superior frontal          | 12  | 32  | 41  | 2.6    | .21  | 3.0e-02 |
|           | L    | LF     | pars opercularis          | -49 | 17  | 14  | 2.6    | .21  | 3.1e-02 |
| alpha1    | L    | LT     | temporal pole             | -28 | 14  | -38 | -4.3   | -.34 | 4.2e-04 |
|           | L    | LT     | entorhinal                | -26 | -5  | -33 | -3.9   | -.31 | 1.1e-03 |
|           | R    | RT     | entorhinal                | 23  | -6  | -35 | -3.8   | -.30 | 1.7e-03 |

| Frequency | Side | Region | Node                  | MNI |    |    | tValue | Est. | FDR p   |
|-----------|------|--------|-----------------------|-----|----|----|--------|------|---------|
|           |      |        |                       | X   | Y  | Z  |        |      |         |
|           | R    | RT     | temporal pole         | 27  | 16 | -  | -3.8   | -.30 | 1.7e-03 |
|           |      |        |                       |     |    | 36 |        |      |         |
|           | L    | LPF    | lateral orbitofrontal | -   | 30 | -  | -3.6   | -.29 | 2.6e-03 |
|           |      |        |                       | 25  |    | 19 |        |      |         |
|           | L    | LPF    | medial orbitofrontal  | -7  | 33 | -  | -3.6   | -.29 | 2.8e-03 |
|           |      |        |                       |     |    | 17 |        |      |         |
|           | L    | LT     | parahippocampal       | -   | -  | -  | -3.5   | -.28 | 4.0e-03 |
|           |      |        |                       | 26  | 29 | 21 |        |      |         |
|           | R    | RPF    | medial orbitofrontal  | 4   | 37 | -  | -3.4   | -.27 | 4.5e-03 |
|           |      |        |                       |     |    | 15 |        |      |         |
|           | R    | RT     | parahippocampal       | 24  | -  | -  | -3.3   | -.26 | 5.9e-03 |
|           |      |        |                       |     | 30 | 19 |        |      |         |
|           | R    | RPF    | Lateral orbitofrontal | 23  | 32 | -  | -3.3   | -.26 | 5.9e-03 |
|           |      |        |                       |     |    | 19 |        |      |         |
|           | R    | RT     | middle temporal       | 58  | -  | -  | -3.2   | -.25 | 8.7e-03 |
|           |      |        |                       |     | 22 | 15 |        |      |         |
|           | R    | RL     | isthmus cingulate     | 6   | -  | 19 | -3.1   | -.25 | 9.6e-03 |
|           |      |        |                       |     |    | 42 |        |      |         |
|           | L    | LL     | isthmus cingulate     | -7  | -  | 18 | -3.1   | -.24 | 1.1e-02 |
|           |      |        |                       |     |    | 45 |        |      |         |
|           | R    | RT     | superior temporal     | 54  | -6 | -7 | -3.1   | -.24 | 1.1e-02 |
|           | R    | RT     | transverse temporal   | 46  | -  | 9  | -3.1   | -.24 | 1.1e-02 |
|           |      |        |                       |     |    | 17 |        |      |         |
|           | R    | RT     | fusiform              | 35  | -  | -  | -3.0   | -.24 | 1.2e-02 |
|           |      |        |                       |     | 41 | 23 |        |      |         |
|           | R    | RT     | inferior temporal     | 51  | -  | -  | -3.0   | -.24 | 1.3e-02 |
|           |      |        |                       |     | 32 | 25 |        |      |         |
|           | R    | RO     | cuneus                | 8   | -  | 20 | -2.9   | -.23 | 1.5e-02 |
|           |      |        |                       |     |    | 78 |        |      |         |
|           | L    | LO     | cuneus                | -6  | -  | 19 | -2.9   | -.23 | 1.5e-02 |
|           |      |        |                       |     |    | 80 |        |      |         |
|           | L    | LT     | fusiform              | -   | -  | -  | -2.9   | -.23 | 1.6e-02 |
|           |      |        |                       | 36  | 43 | 22 |        |      |         |
|           | R    | RT     | insula                | 36  | 2  | -2 | -2.8   | -.22 | 2.0e-02 |

| Frequency | Side | Region | Node                       | MNI |    |    | tValue | Est. | FDR p   |
|-----------|------|--------|----------------------------|-----|----|----|--------|------|---------|
|           |      |        |                            | X   | Y  | Z  |        |      |         |
|           | R    | RP     | precuneus                  | 10  | -  | 38 | -2.8   | -.22 | 2.1e-02 |
|           |      |        |                            |     | 58 |    |        |      |         |
|           | L    | LP     | precuneus                  | -9  | -  | 38 | -2.8   | -.22 | 2.1e-02 |
|           |      |        |                            |     | 59 |    |        |      |         |
|           | R    | RO     | lingual                    | 13  | -  | -4 | -2.8   | -.22 | 2.2e-02 |
|           |      |        |                            |     | 67 |    |        |      |         |
|           | L    | LT     | middle temporal            | -   | -  | -  | -2.8   | -.22 | 2.2e-02 |
|           |      |        |                            | 58  | 23 | 15 |        |      |         |
|           | L    | LO     | lingual                    | -   | -  | -5 | -2.8   | -.22 | 2.2e-02 |
|           |      |        |                            | 14  | 71 |    |        |      |         |
|           | L    | LT     | inferior temporal          | -   | -  | -  | -2.7   | -.21 | 2.5e-02 |
|           |      |        |                            | 53  | 36 | 22 |        |      |         |
|           | R    | RT     | Banks of STS               | 54  | -  | 10 | -2.7   | -.21 | 2.5e-02 |
|           |      |        |                            |     | 41 |    |        |      |         |
|           | L    | LT     | superior temporal          | -   | -  | -4 | -2.7   | -.21 | 2.6e-02 |
|           |      |        |                            | 55  | 12 |    |        |      |         |
|           | R    | RO     | pericalcarine              | 12  | -  | 7  | -2.7   | -.21 | 2.6e-02 |
|           |      |        |                            |     | 80 |    |        |      |         |
|           | L    | LO     | pericalcarine              | -   | -  | 6  | -2.6   | -.21 | 2.9e-02 |
|           |      |        |                            | 11  | 82 |    |        |      |         |
|           | L    | LT     | insula                     | -   | -2 | 2  | -2.6   | -.21 | 3.0e-02 |
|           |      |        |                            | 38  |    |    |        |      |         |
|           | R    | RP     | superior parietal          | 24  | -  | 51 | -2.6   | -.21 | 3.1e-02 |
|           |      |        |                            |     | 65 |    |        |      |         |
|           | L    | LL     | rostral anterior cingulate | -5  | 39 | 1  | -2.6   | -.20 | 3.2e-02 |
|           | L    | LT     | transverse temporal        | -   | -  | 10 | -2.6   | -.20 | 3.3e-02 |
|           |      |        |                            | 46  | 23 |    |        |      |         |
|           | R    | RPF    | frontal pole               | 7   | 68 | -  | -2.4   | -.19 | 4.5e-02 |
|           |      |        |                            |     | 15 |    |        |      |         |
|           | R    | RC     | postcentral                | 44  | -  | 46 | -2.4   | -.19 | 4.6e-02 |
|           |      |        |                            |     | 20 |    |        |      |         |
|           | R    | RP     | supramarginal              | 54  | -  | 36 | -2.4   | -.19 | 4.6e-02 |
|           |      |        |                            |     | 31 |    |        |      |         |

| Frequency | Side | Region | Node                      | MNI |     |     | tValue | Est. | FDR p   |
|-----------|------|--------|---------------------------|-----|-----|-----|--------|------|---------|
|           |      |        |                           | X   | Y   | Z   |        |      |         |
|           | R    | RPF    | pars orbitalis            | 43  | 42  | -15 | -2.4   | -.19 | 4.9e-02 |
| alpha2    | L    | LC     | paracentral               | -7  | -30 | 57  | -6.3   | -.50 | 2.0e-06 |
|           | L    | LL     | posterior cingulate       | -5  | -15 | 38  | -6.1   | -.48 | 2.4e-06 |
|           | R    | RL     | posterior cingulate       | 5   | -17 | 39  | -6.0   | -.48 | 2.4e-06 |
|           | R    | RC     | paracentral               | 7   | -27 | 57  | -5.9   | -.47 | 2.5e-06 |
|           | L    | LL     | isthmus cingulate         | -7  | -45 | 18  | -5.6   | -.44 | 1.0e-05 |
|           | R    | RL     | isthmus cingulate         | 6   | -42 | 19  | -5.6   | -.44 | 1.0e-05 |
|           | L    | LP     | precuneus                 | -9  | -59 | 38  | -5.3   | -.42 | 3.5e-05 |
|           | L    | LL     | Caudal anterior cingulate | -5  | 21  | 26  | -5.2   | -.41 | 4.1e-05 |
|           | R    | RP     | Precuneus                 | 10  | -58 | 38  | -5.2   | -.41 | 4.1e-05 |
|           | R    | RC     | Postcentral               | 44  | -20 | 46  | -5.1   | -.41 | 5.0e-05 |
|           | R    | RL     | Caudal anterior cingulate | 4   | 22  | 27  | -5.1   | -.40 | 5.8e-05 |
|           | R    | RC     | precentral                | 40  | -7  | 46  | -5.0   | -.40 | 6.4e-05 |
|           | R    | RT     | transverse temporal       | 46  | -17 | 9   | -5.0   | -.40 | 6.4e-05 |
|           | L    | LP     | superior parietal         | -23 | -65 | 50  | -5.0   | -.39 | 6.7e-05 |
|           | L    | LPF    | medial orbitofrontal      | -7  | 33  | -17 | -4.9   | -.39 | 6.8e-05 |
|           | L    | LT     | temporal pole             | -28 | 14  | -38 | -4.9   | -.39 | 6.8e-05 |
|           | R    | RPF    | medial orbitofrontal      | 4   | 37  | -15 | -4.9   | -.39 | 6.8e-05 |

| Frequency | Side | Region | Node                       | MNI |    |    | tValue | Est. | FDR p   |
|-----------|------|--------|----------------------------|-----|----|----|--------|------|---------|
|           |      |        |                            | X   | Y  | Z  |        |      |         |
|           | R    | RP     | superior parietal          | 24  | -  | 51 | -4.9   | -.39 | 7.1e-05 |
|           |      |        |                            |     | 65 |    |        |      |         |
|           | R    | RT     | temporal pole              | 27  | 16 | -  | -4.9   | -.39 | 7.1e-05 |
|           |      |        |                            |     | 36 |    |        |      |         |
|           | L    | LC     | precentral                 | -   | -9 | 46 | -4.9   | -.39 | 7.2e-05 |
|           |      |        |                            | 41  |    |    |        |      |         |
|           | R    | RL     | rostral anterior cingulate | 4   | 38 | 3  | -4.8   | -.38 | 8.0e-05 |
|           | L    | LC     | postcentral                | -   | -  | 45 | -4.8   | -.38 | 8.2e-05 |
|           |      |        |                            | 46  | 22 |    |        |      |         |
|           | R    | RT     | entorhinal                 | 23  | -6 | -  | -4.8   | -.38 | 8.4e-05 |
|           |      |        |                            |     | 35 |    |        |      |         |
|           | L    | LL     | Rostral anterior cingulate | -5  | 39 | 1  | -4.8   | -.38 | 8.9e-05 |
|           | R    | RT     | parahippocampal            | 24  | -  | -  | -4.8   | -.38 | 8.9e-05 |
|           |      |        |                            |     | 30 | 19 |        |      |         |
|           | L    | LT     | entorhinal                 | -   | -5 | -  | -4.7   | -.37 | 1.1e-04 |
|           |      |        |                            | 26  |    | 33 |        |      |         |
|           | L    | LPF    | lateral orbitofrontal      | -   | 30 | -  | -4.7   | -.37 | 1.1e-04 |
|           |      |        |                            | 25  |    | 19 |        |      |         |
|           | R    | RP     | supramarginal              | 54  | -  | 36 | -4.7   | -.37 | 1.1e-04 |
|           |      |        |                            |     | 31 |    |        |      |         |
|           | R    | RPF    | lateral orbitofrontal      | 23  | 32 | -  | -4.7   | -.37 | 1.1e-04 |
|           |      |        |                            |     | 19 |    |        |      |         |
|           | L    | LT     | parahippocampal            | -   | -  | -  | -4.6   | -.37 | 1.2e-04 |
|           |      |        |                            | 26  | 29 | 21 |        |      |         |
|           | L    | LT     | insula                     | -   | -2 | 2  | -4.6   | -.37 | 1.4e-04 |
|           |      |        |                            | 38  |    |    |        |      |         |
|           | R    | RT     | insula                     | 36  | 2  | -2 | -4.6   | -.37 | 1.4e-04 |
|           | L    | LT     | transverse temporal        | -   | -  | 10 | -4.6   | -.36 | 1.5e-04 |
|           |      |        |                            | 46  | 23 |    |        |      |         |
|           | R    | RO     | cuneus                     | 8   | -  | 20 | -4.5   | -.36 | 1.6e-04 |
|           |      |        |                            |     | 78 |    |        |      |         |
|           | L    | LO     | cuneus                     | -6  | -  | 19 | -4.4   | -.35 | 2.4e-04 |
|           |      |        |                            |     | 80 |    |        |      |         |



| Frequency | Side | Region | Node                  | MNI |     |     | tValue | Est. | FDR p   |
|-----------|------|--------|-----------------------|-----|-----|-----|--------|------|---------|
|           |      |        |                       | X   | Y   | Z   |        |      |         |
|           | R    | RF     | caudal middle frontal | 37  | 13  | 48  | -4.4   | -.35 | 2.9e-04 |
|           | R    | RT     | middle temporal       | 58  | -22 | -15 | -4.4   | -.35 | 3.1e-04 |
|           | L    | LP     | inferior parietal     | -42 | -71 | 32  | -4.3   | -.34 | 3.3e-04 |
|           | L    | LF     | superior frontal      | -12 | 30  | 41  | -4.3   | -.34 | 3.5e-04 |
|           | R    | RT     | superior temporal     | 54  | -6  | -7  | -4.3   | -.34 | 3.6e-04 |
|           | L    | LF     | caudal middle frontal | -37 | 11  | 47  | -4.3   | -.34 | 4.0e-04 |
|           | R    | RP     | inferior parietal     | 46  | -63 | 32  | -4.2   | -.34 | 4.4e-04 |
|           | R    | RT     | inferior temporal     | 51  | -32 | -25 | -4.2   | -.33 | 5.4e-04 |
|           | L    | LP     | supramarginal         | -57 | -38 | 34  | -4.1   | -.33 | 5.7e-04 |
|           | R    | RF     | superior frontal      | 12  | 32  | 41  | -4.1   | -.33 | 5.8e-04 |
|           | R    | RT     | fusiform              | 35  | -41 | -23 | -4.1   | -.33 | 6.2e-04 |
|           | R    | RT     | Bank of STS           | 54  | -41 | 10  | -4.1   | -.33 | 6.2e-04 |
|           | R    | RO     | lingual               | 13  | -67 | -4  | -3.9   | -.31 | 1.4e-03 |
|           | R    | RO     | pericalcarine         | 12  | -80 | 7   | -3.8   | -.30 | 1.7e-03 |
|           | L    | LT     | banks of STS          | -53 | -45 | 8   | -3.8   | -.30 | 1.7e-03 |
|           | L    | LT     | fusiform              | -36 | -43 | -22 | -3.7   | -.30 | 1.9e-03 |
|           | L    | LO     | lingual               | -14 | -71 | -5  | -3.7   | -.30 | 2.0e-03 |
|           | L    | LT     | superior temporal     | -55 | -12 | -4  | -3.7   | -.30 | 2.0e-03 |

| Frequency | Side | Region | Node                   | MNI |     |     | tValue | Est. | FDR p   |
|-----------|------|--------|------------------------|-----|-----|-----|--------|------|---------|
|           |      |        |                        | X   | Y   | Z   |        |      |         |
|           | L    | LO     | pericalcarine          | -11 | -82 | 6   | -3.7   | -.29 | 2.1e-03 |
|           | R    | RPF    | pars orbitalis         | 43  | 42  | -15 | -3.6   | -.29 | 2.6e-03 |
|           | L    | LT     | middle temporal        | -58 | -23 | -15 | -3.6   | -.28 | 3.2e-03 |
|           | L    | LT     | inferior temporal      | -53 | -36 | -22 | -3.6   | -.28 | 3.2e-03 |
|           | R    | RPF    | frontalpole            | 7   | 68  | -15 | -3.5   | -.28 | 3.5e-03 |
|           | L    | LPF    | frontal pole           | -7  | 68  | -11 | -3.5   | -.28 | 3.9e-03 |
|           | L    | LF     | pars opercularis       | -49 | 17  | 14  | -3.5   | -.28 | 4.0e-03 |
|           | R    | RF     | pars opercularis       | 49  | 17  | 14  | -3.4   | -.27 | 5.5e-03 |
|           | R    | RO     | lateral occipital      | 35  | -85 | 2   | -3.3   | -.26 | 5.9e-03 |
|           | L    | LPF    | pars orbitalis         | -44 | 39  | -14 | -3.2   | -.26 | 7.9e-03 |
|           | L    | LF     | parst riangularis      | -47 | 32  | 1   | -3.2   | -.25 | 8.2e-03 |
|           | R    | RF     | pars triangularis      | 48  | 34  | 2   | -3.2   | -.25 | 8.7e-03 |
|           | L    | LO     | lateral occipital      | -31 | -89 | 0   | -3.2   | -.25 | 9.0e-03 |
|           | L    | LF     | rostral middle frontal | -34 | 47  | 17  | -2.9   | -.23 | 1.6e-02 |
|           | R    | RF     | rostra lmiddle frontal | 34  | 48  | 17  | -2.8   | -.22 | 2.2e-02 |
| beta      | R    | RPF    | frontal pole           | 7   | 68  | -15 | -3.5   | -.28 | 4.1e-03 |
|           | L    | LPF    | frontal pole           | -7  | 68  | -11 | -3.4   | -.27 | 4.5e-03 |
|           | R    | RPF    | medial orbitofrontal   | 4   | 37  | -15 | -3.2   | -.25 | 9.0e-03 |

| Frequency | Side | Region | Node                       | MNI |     |     | tValue | Est. | FDR p   |
|-----------|------|--------|----------------------------|-----|-----|-----|--------|------|---------|
|           |      |        |                            | X   | Y   | Z   |        |      |         |
|           | R    | RPF    | pars orbitalis             | 43  | 42  | -15 | -3.1   | -.25 | 9.9e-03 |
|           | L    | LPF    | medial orbitofrontal       | -7  | 33  | -17 | -3.1   | -.25 | 1.0e-02 |
|           | L    | LL     | rostral anterior cingulate | -5  | 39  | 1   | -2.9   | -.23 | 1.6e-02 |
|           | L    | LP     | superior parietal          | -23 | -65 | 50  | -2.9   | -.23 | 1.6e-02 |
|           | L    | LPF    | lateral orbitofrontal      | -25 | 30  | 19  | -2.9   | -.23 | 1.7e-02 |
|           | R    | RPF    | lateral orbitofrontal      | 23  | 32  | 19  | -2.9   | -.23 | 1.7e-02 |
|           | R    | RT     | temporal pole              | 27  | 16  | 36  | -2.8   | -.23 | 1.8e-02 |
|           | R    | RL     | rostral anterior cingulate | 4   | 38  | 3   | -2.8   | -.22 | 2.2e-02 |
|           | R    | RP     | superior parietal          | 24  | -65 | 51  | -2.7   | -.21 | 2.5e-02 |
|           | L    | LPF    | pars orbitalis             | -44 | 39  | 14  | -2.7   | -.21 | 2.6e-02 |
|           | L    | LT     | temporal pole              | -28 | 14  | 38  | -2.7   | -.21 | 2.6e-02 |
|           | R    | RF     | pars triangularis          | 48  | 34  | 2   | -2.6   | -.20 | 3.2e-02 |
| gamma1    | L    | LT     | Bank of STS                | -53 | -45 | 8   | 4.5    | .36  | 1.6e-04 |
|           | R    | RT     | transverse temporal        | 46  | -17 | 9   | 4.2    | .33  | 5.4e-04 |
|           | R    | RL     | isthmus cingulate          | 6   | -42 | 19  | 3.3    | .26  | 6.4e-03 |
|           | L    | LP     | supramarginal              | -57 | -38 | 34  | 3.3    | .26  | 6.5e-03 |
|           | L    | LT     | transverse temporal        | -46 | -23 | 10  | 3.2    | .25  | 8.2e-03 |
|           | R    | RT     | parahippocampal            | 24  | -30 | -19 | 3.1    | .24  | 1.1e-02 |

| Frequency | Side | Region | Node                | MNI |    |    | tValue | Est. | FDR p   |
|-----------|------|--------|---------------------|-----|----|----|--------|------|---------|
|           |      |        |                     | X   | Y  | Z  |        |      |         |
|           | L    | LL     | isthmus cingulate   | -7  | -  | 18 | 3.0    | .24  | 1.2e-02 |
|           |      |        |                     |     | 45 |    |        |      |         |
|           | R    | RT     | Bank of STS         | 54  | -  | 10 | 2.9    | .23  | 1.7e-02 |
|           |      |        |                     |     | 41 |    |        |      |         |
|           | L    | LT     | middle temporal     | -   | -  | -  | 2.7    | .22  | 2.4e-02 |
|           |      |        |                     | 58  | 23 | 15 |        |      |         |
|           | L    | LT     | inferior temporal   | -   | -  | -  | 2.7    | .22  | 2.4e-02 |
|           |      |        |                     | 53  | 36 | 22 |        |      |         |
|           | L    | LT     | superior temporal   | -   | -  | -4 | 2.7    | .21  | 2.7e-02 |
|           |      |        |                     | 55  | 12 |    |        |      |         |
|           | L    | LT     | fusiform            | -   | -  | -  | 2.5    | .20  | 4.1e-02 |
|           |      |        |                     | 36  | 43 | 22 |        |      |         |
|           | R    | RP     | supramarginal       | 54  | -  | 36 | 2.4    | .19  | 4.6e-02 |
|           |      |        |                     |     | 31 |    |        |      |         |
|           | R    | RC     | postcentral         | 44  | -  | 46 | 2.4    | .19  | 4.6e-02 |
|           |      |        |                     |     | 20 |    |        |      |         |
|           | L    | LT     | parahippocampal     | -   | -  | -  | 2.4    | .19  | 4.6e-02 |
|           |      |        |                     | 26  | 29 | 21 |        |      |         |
| gamma2    | L    | LT     | Bank of STS         | -   | -  | 8  | 4.4    | .35  | 3.0e-04 |
|           |      |        |                     | 53  | 45 |    |        |      |         |
|           | R    | RT     | transverse temporal | 46  | -  | 9  | 3.8    | .30  | 1.5e-03 |
|           |      |        |                     |     | 17 |    |        |      |         |
|           | L    | LT     | transverse temporal | -   | -  | 10 | 3.4    | .27  | 4.8e-03 |
|           |      |        |                     | 46  | 23 |    |        |      |         |
|           | L    | LP     | supramarginal       | -   | -  | 34 | 3.2    | .26  | 7.9e-03 |
|           |      |        |                     | 57  | 38 |    |        |      |         |
|           | R    | RT     | bank of STS         | 54  | -  | 10 | 3.1    | .24  | 1.1e-02 |
|           |      |        |                     |     | 41 |    |        |      |         |
|           | L    | LT     | superior temporal   | -   | -  | -4 | 2.9    | .23  | 1.7e-02 |
|           |      |        |                     | 55  | 12 |    |        |      |         |
|           | R    | RT     | parahippocampal     | 24  | -  | -  | 2.8    | .22  | 1.9e-02 |
|           |      |        |                     |     | 30 | 19 |        |      |         |
|           | L    | LT     | middle temporal     | -   | -  | -  | 2.8    | .22  | 2.0e-02 |
|           |      |        |                     | 58  | 23 | 15 |        |      |         |

| Frequency | Side | Region | Node              | MNI |     |     | tValue | Est. | FDR p   |
|-----------|------|--------|-------------------|-----|-----|-----|--------|------|---------|
|           |      |        |                   | X   | Y   | Z   |        |      |         |
|           | L    | LPF    | frontal pole      | -7  | 68  | -11 | -2.6   | -.21 | 2.9e-02 |
|           | R    | RPF    | frontal pole      | 7   | 68  | 15  | -2.6   | -.20 | 3.2e-02 |
|           | L    | LT     | inferior temporal | -53 | -36 | -22 | 2.6    | .20  | 3.2e-02 |
|           | R    | RL     | isthmus cingulate | 6   | -42 | 19  | 2.5    | .20  | 4.0e-02 |
|           | R    | RT     | superior temporal | 54  | -6  | -7  | 2.4    | .19  | 4.4e-02 |

**Table S4: Regional sex and group differences in source-localized relative power by frequency band**

Group and sex differences in relative power between FXS and controls by cortical region. A total of 68 DK atlas nodes are organized into cortical regions (central, frontal, occipital, parietal, and temporal). Following FDR correction of all possible comparisons, four sets of a priori comparisons of interest are listed including 1) matched sex, between group (FXS versus control) and 2) matched group, between sex (M-F). FXS, Fragile X Syndrome; TDC, Typically Developing Control; F, female; M, male; Freq., frequency band; Est, Least-squares mean estimate; SEM, standard error of the mean; Sig., significance following 5% FDR correction: n.s., non-significant; \*, FDR  $p < .05$ ; \*\*, FDR  $p < 0.001$ ; \*\*\*, FDR  $p < 1 \times 10^{-5}$ .

| Diff.             | Freq.     | Region    | DF  | Est.  | SEM   | t      | FDR p  | Sig. |
|-------------------|-----------|-----------|-----|-------|-------|--------|--------|------|
| FXS(M)-<br>FXS(F) | Delta     | Central   | 723 | .02   | .06   | -.25   | 0.809  | n.s. |
|                   |           | Frontal   | 277 | .09   | .05   | -1.74  | 0.088  | n.s. |
|                   |           | Occipital | 531 | -.03  | .06   | .53    | 0.609  | n.s. |
|                   |           | Parietal  | 531 | -.02  | .06   | .32    | 0.759  | n.s. |
|                   |           | Temporal  | 219 | .05   | .05   | -1.09  | 0.287  | n.s. |
|                   | Theta     | Central   | 723 | .13   | .06   | -1.98  | 0.051  | n.s. |
|                   |           | Frontal   | 277 | -.05  | .05   | .93    | 0.366  | n.s. |
|                   |           | Occipital | 531 | -.002 | .06   | .03    | 0.975  | n.s. |
|                   |           | Parietal  | 531 | .10   | .06   | -1.71  | 0.094  | n.s. |
|                   |           | Temporal  | 219 | -.002 | .05   | .05    | 0.965  | n.s. |
|                   | Alpha1    | Central   | 723 | -.09  | .06   | 1.37   | 0.179  | n.s. |
|                   |           | Frontal   | 277 | -.21  | .05   | 4.11   | <0.001 | **   |
|                   |           | Occipital | 531 | -.06  | .06   | 1.10   | 0.281  | n.s. |
|                   |           | Parietal  | 531 | -.05  | .06   | .84    | 0.412  | n.s. |
|                   |           | Temporal  | 219 | -.18  | .05   | 3.83   | <0.001 | **   |
|                   | Alpha2    | Central   | 723 | -.27  | .06   | 4.22   | <0.001 | **   |
|                   |           | Frontal   | 277 | -.20  | .05   | 3.95   | <0.001 | **   |
|                   |           | Occipital | 531 | -.04  | .06   | .60    | 0.556  | n.s. |
|                   |           | Parietal  | 531 | -.15  | .06   | 2.49   | 0.014  | *    |
|                   |           | Temporal  | 219 | -.18  | .05   | 3.86   | <0.001 | **   |
| Beta              | Central   | 723       | .26 | .06   | -3.99 | <0.001 | **     |      |
|                   | Frontal   | 277       | .11 | .05   | -2.11 | 0.038  | *      |      |
|                   | Occipital | 531       | .22 | .06   | -3.73 | <0.001 | **     |      |
|                   | Parietal  | 531       | .14 | .06   | -2.32 | 0.022  | *      |      |
|                   | Temporal  | 219       | .18 | .05   | -3.74 | <0.001 | **     |      |
| Gamma1            | Central   | 723       | .42 | .06   | -6.51 | <0.001 | ***    |      |
|                   | Frontal   | 277       | .26 | .05   | -5.09 | <0.001 | ***    |      |
|                   | Occipital | 531       | .48 | .06   | -8.17 | <0.001 | ***    |      |
|                   | Parietal  | 531       | .36 | .06   | -6.14 | <0.001 | ***    |      |

| Diff.             | Freq.     | Region    | DF   | Est. | SEM   | t      | FDR p  | Sig. |
|-------------------|-----------|-----------|------|------|-------|--------|--------|------|
| FXS(F)-<br>TDC(F) | Gamma2    | Temporal  | 219  | .39  | .05   | -8.26  | <0.001 | ***  |
|                   |           | Central   | 723  | .46  | .06   | -7.23  | <0.001 | ***  |
|                   |           | Frontal   | 277  | .32  | .05   | -6.27  | <0.001 | ***  |
|                   |           | Occipital | 531  | .40  | .06   | -6.76  | <0.001 | ***  |
|                   |           | Parietal  | 531  | .37  | .06   | -6.26  | <0.001 | ***  |
|                   | Delta     | Temporal  | 219  | .43  | .05   | -8.98  | <0.001 | ***  |
|                   |           | Central   | 723  | .01  | .07   | .13    | 0.897  | n.s. |
|                   |           | Frontal   | 277  | .05  | .05   | .92    | 0.369  | n.s. |
|                   |           | Occipital | 531  | .08  | .06   | 1.23   | 0.230  | n.s. |
|                   |           | Parietal  | 531  | .03  | .06   | .48    | 0.639  | n.s. |
|                   | Theta     | Temporal  | 219  | .04  | .05   | .77    | 0.455  | n.s. |
|                   |           | Central   | 723  | .16  | .07   | 2.41   | 0.017  | *    |
|                   |           | Frontal   | 277  | .16  | .05   | 3.01   | 0.003  | *    |
|                   |           | Occipital | 531  | .12  | .06   | 2.00   | 0.050  | *    |
|                   |           | Parietal  | 531  | .15  | .06   | 2.44   | 0.016  | *    |
|                   | Alpha1    | Temporal  | 219  | .15  | .05   | 2.94   | 0.004  | *    |
|                   |           | Central   | 723  | -.05 | .07   | -.74   | 0.468  | n.s. |
|                   |           | Frontal   | 277  | -.08 | .05   | -1.52  | 0.137  | n.s. |
|                   |           | Occipital | 531  | -.18 | .06   | -2.84  | 0.005  | *    |
|                   |           | Parietal  | 531  | -.07 | .06   | -1.18  | 0.250  | n.s. |
|                   | Alpha2    | Temporal  | 219  | -.14 | .05   | -2.73  | 0.007  | *    |
|                   |           | Central   | 723  | -.20 | .07   | -3.00  | 0.003  | *    |
|                   |           | Frontal   | 277  | -.22 | .05   | -4.09  | <0.001 | **   |
|                   |           | Occipital | 531  | -.28 | .06   | -4.53  | <0.001 | ***  |
|                   |           | Parietal  | 531  | -.20 | .06   | -3.27  | 0.001  | *    |
|                   | Beta      | Temporal  | 219  | -.26 | .05   | -5.12  | <0.001 | ***  |
|                   |           | Central   | 723  | -.19 | .07   | -2.75  | 0.007  | *    |
|                   |           | Frontal   | 277  | -.31 | .05   | -5.79  | <0.001 | ***  |
| Occipital         |           | 531       | -.16 | .06  | -2.61 | 0.010  | *      |      |
| Parietal          |           | 531       | -.20 | .06  | -3.21 | 0.002  | *      |      |
| Gamma1            | Temporal  | 219       | -.18 | .05  | -3.53 | <0.001 | **     |      |
|                   | Central   | 723       | -.16 | .07  | -2.29 | 0.024  | *      |      |
|                   | Frontal   | 277       | -.33 | .05  | -6.17 | <0.001 | ***    |      |
|                   | Occipital | 531       | -.04 | .06  | -.72  | 0.483  | n.s.   |      |
|                   | Parietal  | 531       | -.13 | .06  | -2.00 | 0.049  | *      |      |
| Gamma2            | Temporal  | 219       | -.07 | .05  | -1.41 | 0.166  | n.s.   |      |
|                   | Central   | 723       | -.31 | .07  | -4.54 | <0.001 | ***    |      |
|                   | Frontal   | 277       | -.39 | .05  | -7.35 | <0.001 | ***    |      |
|                   | Occipital | 531       | -.06 | .06  | -.91  | 0.374  | n.s.   |      |
|                   | Parietal  | 531       | -.24 | .06  | -3.88 | <0.001 | **     |      |
| FXS(M)-<br>TDC(M) | Delta     | Temporal  | 219  | -.12 | .05   | -2.37  | 0.020  | *    |
|                   |           | Central   | 723  | .11  | .06   | 1.76   | 0.084  | n.s. |
|                   |           | Frontal   | 277  | .04  | .05   | .88    | 0.393  | n.s. |
|                   |           | Occipital | 531  | .05  | .06   | .83    | 0.417  | n.s. |

| Diff.             | Freq.     | Region    | DF    | Est. | SEM   | t      | FDR p  | Sig. |
|-------------------|-----------|-----------|-------|------|-------|--------|--------|------|
| TDC(M)-<br>TDC(F) | Theta     | Parietal  | 531   | .12  | .06   | 2.08   | 0.041  | *    |
|                   |           | Temporal  | 219   | .05  | .04   | 1.21   | 0.236  | n.s. |
|                   |           | Central   | 723   | .37  | .06   | 6.20   | <0.001 | ***  |
|                   |           | Frontal   | 277   | .14  | .05   | 3.04   | 0.003  | *    |
|                   |           | Occipital | 531   | .23  | .06   | 4.19   | <0.001 | **   |
|                   | Alpha1    | Parietal  | 531   | .35  | .06   | 6.27   | <0.001 | ***  |
|                   |           | Temporal  | 219   | .21  | .04   | 4.66   | <0.001 | ***  |
|                   |           | Central   | 723   | -.25 | .06   | -4.18  | <0.001 | **   |
|                   |           | Frontal   | 277   | -.24 | .05   | -5.08  | <0.001 | ***  |
|                   |           | Occipital | 531   | -.23 | .06   | -4.16  | <0.001 | **   |
|                   | Alpha2    | Parietal  | 531   | -.28 | .06   | -4.95  | <0.001 | ***  |
|                   |           | Temporal  | 219   | -.31 | .04   | -6.88  | <0.001 | ***  |
|                   |           | Central   | 723   | -.60 | .06   | -10.00 | <0.001 | ***  |
|                   |           | Frontal   | 277   | -.38 | .05   | -8.03  | <0.001 | ***  |
|                   |           | Occipital | 531   | -.32 | .06   | -5.74  | <0.001 | ***  |
|                   | Beta      | Parietal  | 531   | -.51 | .06   | -9.10  | <0.001 | ***  |
|                   |           | Temporal  | 219   | -.46 | .04   | -10.33 | <0.001 | ***  |
|                   |           | Central   | 723   | .002 | .06   | .02    | 0.981  | n.s. |
|                   |           | Frontal   | 277   | -.08 | .05   | -1.73  | 0.090  | n.s. |
|                   |           | Occipital | 531   | .001 | .06   | .02    | 0.984  | n.s. |
|                   | Gamma1    | Parietal  | 531   | -.07 | .06   | -1.21  | 0.237  | n.s. |
|                   |           | Temporal  | 219   | .01  | .04   | .18    | 0.862  | n.s. |
|                   |           | Central   | 723   | .34  | .06   | 5.60   | <0.001 | ***  |
|                   |           | Frontal   | 277   | .18  | .05   | 3.80   | <0.001 | **   |
|                   |           | Occipital | 531   | .20  | .06   | 3.62   | <0.001 | **   |
|                   | Gamma2    | Parietal  | 531   | .30  | .06   | 5.46   | <0.001 | ***  |
|                   |           | Temporal  | 219   | .35  | .04   | 7.88   | <0.001 | ***  |
|                   |           | Central   | 723   | .36  | .06   | 6.01   | <0.001 | ***  |
|                   |           | Frontal   | 277   | .20  | .05   | 4.15   | <0.001 | **   |
|                   |           | Occipital | 531   | .11  | .06   | 1.93   | 0.058  | n.s. |
|                   | Delta     | Parietal  | 531   | .28  | .06   | 4.96   | <0.001 | ***  |
|                   |           | Temporal  | 219   | .36  | .04   | 8.10   | <0.001 | ***  |
|                   |           | Central   | 723   | -.08 | .06   | 1.26   | 0.218  | n.s. |
| Frontal           |           | 277       | .10   | .05  | -1.89 | 0.063  | n.s.   |      |
| Occipital         |           | 531       | -.001 | .06  | .01   | 0.993  | n.s.   |      |
| Theta             | Parietal  | 531       | -.10  | .06  | 1.75  | 0.085  | n.s.   |      |
|                   | Temporal  | 219       | .04   | .05  | -.76  | 0.457  | n.s.   |      |
|                   | Central   | 723       | -.08  | .06  | 1.28  | 0.211  | n.s.   |      |
|                   | Frontal   | 277       | -.03  | .05  | .60   | 0.561  | n.s.   |      |
|                   | Occipital | 531       | -.11  | .06  | 1.85  | 0.069  | n.s.   |      |
|                   |           | Parietal  | 531   | -.09 | .06   | 1.59   | 0.119  | n.s. |



| Diff. | Freq.  | Region    | DF  | Est.  | SEM | t     | FDR p  | Sig. |
|-------|--------|-----------|-----|-------|-----|-------|--------|------|
|       |        | Temporal  | 219 | -.06  | .05 | 1.30  | 0.204  | n.s. |
|       | Alpha1 | Central   | 723 | .11   | .06 | -1.77 | 0.083  | n.s. |
|       |        | Frontal   | 277 | -.05  | .05 | .95   | 0.355  | n.s. |
|       |        | Occipital | 531 | -.01  | .06 | .21   | 0.843  | n.s. |
|       |        | Parietal  | 531 | .15   | .06 | -2.56 | 0.012  | *    |
|       | Alpha2 | Temporal  | 219 | -.01  | .05 | .27   | 0.797  | n.s. |
|       |        | Central   | 723 | .13   | .06 | -1.99 | 0.051  | n.s. |
|       |        | Frontal   | 277 | -.04  | .05 | .75   | 0.466  | n.s. |
|       |        | Occipital | 531 | -.001 | .06 | .02   | 0.982  | n.s. |
|       |        | Parietal  | 531 | .15   | .06 | -2.59 | 0.011  | *    |
|       | Beta   | Temporal  | 219 | .02   | .05 | -.41  | 0.693  | n.s. |
|       |        | Central   | 723 | .07   | .06 | -1.05 | 0.303  | n.s. |
|       |        | Frontal   | 277 | -.12  | .05 | 2.39  | 0.019  | *    |
|       |        | Occipital | 531 | .06   | .06 | -.95  | 0.356  | n.s. |
|       |        | Parietal  | 531 | .003  | .06 | -.05  | 0.959  | n.s. |
|       | Gamma1 | Temporal  | 219 | -.01  | .05 | .17   | 0.873  | n.s. |
|       |        | Central   | 723 | -.07  | .06 | 1.18  | 0.250  | n.s. |
|       |        | Frontal   | 277 | -.25  | .05 | 5.01  | <0.001 | ***  |
|       |        | Occipital | 531 | .24   | .06 | -4.01 | <0.001 | **   |
|       |        | Parietal  | 531 | -.06  | .06 | 1.09  | 0.285  | n.s. |
|       | Gamma2 | Temporal  | 219 | -.03  | .05 | .63   | 0.539  | n.s. |
|       |        | Central   | 723 | -.21  | .06 | 3.22  | 0.002  | *    |
|       |        | Frontal   | 277 | -.27  | .05 | 5.39  | <0.001 | ***  |
|       |        | Occipital | 531 | .24   | .06 | -3.98 | <0.001 | **   |
|       |        | Parietal  | 531 | -.15  | .06 | 2.50  | 0.014  | *    |
|       |        | Temporal  | 219 | -.05  | .05 | 1.13  | 0.271  | n.s. |

**Table S5: Mean Alpha Shift (alpha1/alpha2 power) by group and sex.**

| Group       | n  | Occipital  | Parietal   | Central    | Frontal    |
|-------------|----|------------|------------|------------|------------|
| FXS (F)     | 32 | 1.41(0.36) | 1.55(0.58) | 1.74(0.90) | 1.69(0.71) |
| FXS (M)     | 38 | 1.36(0.27) | 1.64(0.37) | 1.93(0.61) | 1.66(0.49) |
| Control (F) | 30 | 1.32(0.57) | 1.40(0.64) | 1.49(0.80) | 1.46(0.64) |
| Control (M) | 41 | 1.31(0.57) | 1.43(0.77) | 1.48(0.81) | 1.41(0.52) |

**Table S6: Differences in alpha shift across cortical regions by group and sex.**

| Sex | Contrast             | Group | Estimate | SE    | DF   | t    | FDR p   | d     | sig  |
|-----|----------------------|-------|----------|-------|------|------|---------|-------|------|
| F   | Central - Frontal    | FXS   | -0.017   | 0.016 | 4359 | -1.1 | 3.1e-1  | -0.03 | n.s. |
|     |                      | TDC   | -0.015   | 0.016 | 4359 | -0.9 | 3.8e-1  | -0.03 | n.s. |
|     | Central - Occipital  | FXS   | 0.115    | 0.016 | 4359 | 7.0  | 9.2e-12 | 0.21  | ***  |
|     |                      | TDC   | 0.069    | 0.017 | 4359 | 4.0  | 1.1e-4  | 0.12  | **   |
|     | Central - Parietal   | FXS   | 0.054    | 0.016 | 4359 | 3.3  | 1.6e-3  | 0.10  | *    |
|     |                      | TDC   | 0.032    | 0.017 | 4359 | 1.9  | 7.1e-2  | 0.06  | n.s. |
|     | Frontal - Occipital  | FXS   | 0.132    | 0.014 | 4359 | 9.2  | 3.3e-19 | 0.28  | ***  |
|     |                      | TDC   | 0.083    | 0.015 | 4359 | 5.6  | 6.3e-8  | 0.17  | ***  |
|     | Frontal - Parietal   | FXS   | 0.071    | 0.014 | 4359 | 4.9  | 2.2e-6  | 0.15  | ***  |
|     |                      | TDC   | 0.047    | 0.015 | 4359 | 3.2  | 2.4e-3  | 0.10  | *    |
|     | Occipital - Parietal | FXS   | -0.061   | 0.015 | 4359 | -4.0 | 1.1e-4  | -0.12 | **   |
|     |                      | TDC   | -0.036   | 0.016 | 4359 | -2.3 | 2.8e-2  | -0.07 | *    |
| M   | Central - Frontal    | FXS   | 0.144    | 0.014 | 4359 | 10.0 | 1.9e-22 | 0.30  | ***  |
|     |                      | TDC   | -0.018   | 0.014 | 4359 | -1.3 | 2.2e-1  | -0.04 | n.s. |
|     | Central - Occipital  | FXS   | 0.327    | 0.015 | 4359 | 21.7 | 6.2e-98 | 0.66  | ***  |
|     |                      | TDC   | 0.065    | 0.014 | 4359 | 4.5  | 1.4e-5  | 0.14  | ***  |
|     | Central - Parietal   | FXS   | 0.138    | 0.015 | 4359 | 9.2  | 2.7e-19 | 0.28  | ***  |
|     |                      | TDC   | 0.020    | 0.014 | 4359 | 1.4  | 2.0e-1  | 0.04  | n.s. |
|     | Frontal - Occipital  | FXS   | 0.183    | 0.013 | 4359 | 13.8 | 1.2e-41 | 0.42  | ***  |
|     |                      | TDC   | 0.083    | 0.013 | 4359 | 6.6  | 1.9e-10 | 0.20  | ***  |

| Sex | Contrast             | Group | Estimate | SE    | DF   | t     | FDR p   | d     | sig  |
|-----|----------------------|-------|----------|-------|------|-------|---------|-------|------|
|     | Frontal - Parietal   | FXS   | -0.005   | 0.013 | 4359 | -0.4  | 6.9e-1  | -0.01 | n.s. |
|     |                      | TDC   | 0.038    | 0.013 | 4359 | 3.0   | 3.8e-3  | 0.09  | *    |
|     | Occipital - Parietal | FXS   | -0.188   | 0.014 | 4359 | -13.5 | 6.7e-40 | -0.41 | ***  |
|     |                      | TDC   | -0.045   | 0.013 | 4359 | -3.4  | 1.3e-3  | -0.10 | *    |

**Table S7: Statistical comparison of FXS-TDC differences in alpha shift between regions.**

Each row represents a between sex-matched group comparison of within group contrasts presented in Table S4.

| Sex | Contrast           | Estimate | SE   | DF   | t       | FDR p   | d     | Sig. |
|-----|--------------------|----------|------|------|---------|---------|-------|------|
| F   | Central-Frontal    | -.002    | .023 | 4359 | -0.094  | 9.4e-1  | -.003 | n.s. |
|     | Occipital-Central  | -.05     | .024 | 4359 | -1.973  | 8.3e-2  | -.06  | n.s. |
|     | Central-Parietal   | .02      | .024 | 4359 | 0.919   | 4.2e-1  | .03   | n.s. |
|     | Occipital-Frontal  | -.05     | .021 | 4359 | -2.349  | 3.8e-2  | -.07  | *    |
|     | Frontal-Parietal   | .02      | .021 | 4359 | 1.149   | 3.2e-1  | .03   | n.s. |
|     | Occipital-Parietal | -.02     | .022 | 4359 | -1.138  | 3.2e-1  | -.03  | n.s. |
| M   | Central-Frontal    | .16      | .020 | 4359 | 8.097   | 8.9e-15 | .25   | ***  |
|     | Occipital-Central  | -.26     | .021 | 4359 | -12.511 | 6.4e-34 | -.38  | ***  |
|     | Central-Parietal   | .12      | .021 | 4359 | 5.663   | 1.2e-7  | .17   | ***  |
|     | Occipital-Frontal  | -.10     | .018 | 4359 | -5.430  | 3.8e-7  | -.16  | ***  |
|     | Frontal-Parietal   | -.04     | .018 | 4359 | -2.367  | 3.7e-2  | -.07  | *    |
|     | Occipital-Parietal | -.14     | .019 | 4359 | -7.396  | 1.8e-12 | -.22  | ***  |

## Clinical Correlations of Cognitive and Sensory Resting State Networks

Spearman clinical correlations were assessed in all FXS participants and in non-mosaic, full mutation males as separate cohorts by resting state network (RSN). Correlation was calculated between clinical measures (non-verbal intelligence quotient (NVIQ), ADAMS Anxiety Scale, ADAMS OCD scale, Social Communication Questionnaire (SCQ), and Woodcock Johnson Test of Auditory Attention (WJ3)) between lower (theta, alpha1, and alpha2) and higher (beta, gamma1, gamma2) frequency bands. After correcting results by 5% FDR correction, we then adjusted significant results for age. Only significant age-corrected correlations ( $p < .05$ ) are presented below with total tests noted.

### Cognitive Network Clinical Correlations

**Table S9: Default Mode Network**

#### Higher Frequency Bands

All FXS Subjects

|                     |           | 6/45 (# Significant / Total Tests) |       |       |               |       |    |
|---------------------|-----------|------------------------------------|-------|-------|---------------|-------|----|
| All FXS subjects    |           | FDR Corrected                      |       |       | Age Corrected |       |    |
| Node                | Frequency | rho                                | p     | FDR p | rho           | p     | n  |
| Parahippocampal L   | gamma1    | -.45                               | 2e-04 | .006  | -.52          | 0.012 | 64 |
| Parahippocampal R   | beta      | -.40                               | .001  | .010  | -.50          | 0.018 | 64 |
| Parahippocampal L   | beta      | -.38                               | .002  | .015  | -.48          | 0.025 | 64 |
|                     | gamma2    | -.37                               | .003  | .016  | -.47          | 0.029 | 64 |
| Isthmus Cingulate R | beta      | -.33                               | .007  | .027  | -.49          | 0.020 | 64 |
| Precuneus L         | beta      | -.32                               | .011  | .037  | -.47          | 0.028 | 64 |

Full mutation males

|                          |           | 3/45 (# Significant / Total Tests) |   |       |               |   |   |
|--------------------------|-----------|------------------------------------|---|-------|---------------|---|---|
| Full mutation males only |           | FDR Corrected                      |   |       | Age Corrected |   |   |
| Node                     | Frequency | rho                                | p | FDR p | rho           | p | n |

| B: Non-verbal IQ (Higher is better) |           | 3/45 (# Significant / Total Tests) |      |       |               |       |    |
|-------------------------------------|-----------|------------------------------------|------|-------|---------------|-------|----|
| Full mutation males only            |           | FDR Corrected                      |      |       | Age Corrected |       |    |
| Node                                | Frequency | rho                                | p    | FDR p | rho           | p     | n  |
| Parahippocampal L                   | beta      | -.62                               | .002 | .046  | -.48          | 0.025 | 22 |
|                                     | gamma1    | -.63                               | .002 | .046  | -.52          | 0.012 | 22 |
| Parahippocampal R                   | beta      | -.60                               | .003 | .049  | -.50          | 0.018 | 22 |

### Lower Frequency Bands

All FXS Subjects

| C: ADAMS OCD Scale (Higher is worse) |           | 8/45 (# Significant / Total Tests) |       |       |               |       |    |
|--------------------------------------|-----------|------------------------------------|-------|-------|---------------|-------|----|
| All FXS subjects                     |           | FDR Corrected                      |       |       | Age Corrected |       |    |
| Node                                 | Frequency | rho                                | p     | FDR p | rho           | p     | n  |
| Lateral Orbitofrontal L              | alpha2    | -.47                               | 1e-04 | .001  | -.41          | 0.035 | 64 |
| Medial Orbitofrontal L               | alpha2    | -.49                               | 4e-05 | .001  | -.46          | 0.016 | 64 |
| Medial Orbitofrontal R               | alpha2    | -.47                               | 1e-04 | .001  | -.44          | 0.020 | 64 |
| Parahippocampal L                    | alpha1    | -.43                               | 3e-04 | .002  | -.47          | 0.013 | 64 |
| Lateral Orbitofrontal R              | alpha2    | -.44                               | 2e-04 | .002  | -.40          | 0.040 | 64 |
| Parahippocampal L                    | alpha2    | -.39                               | .001  | .003  | -.44          | 0.023 | 64 |
| Lateral Orbitofrontal R              | theta     | -.32                               | .011  | .019  | -.40          | 0.036 | 64 |
| Medial Orbitofrontal L               | theta     | -.29                               | .021  | .032  | -.39          | 0.045 | 64 |

| D: SCQ (Higher is worse)     |           | 6/45 (# Significant / Total Tests) |       |       |               |       |    |
|------------------------------|-----------|------------------------------------|-------|-------|---------------|-------|----|
| All FXS subjects             |           | FDR Corrected                      |       |       | Age Corrected |       |    |
| Node                         | Frequency | rho                                | p     | FDR p | rho           | p     | n  |
| Medial Orbitofrontal R       | alpha1    | -.48                               | 1e-04 | .001  | -.43          | 0.038 | 62 |
|                              | alpha2    | -.50                               | 4e-05 | .001  | -.46          | 0.023 | 62 |
| Lateral Orbitofrontal R      | alpha1    | -.43                               | 4e-04 | .002  | -.42          | 0.039 | 62 |
|                              | alpha2    | -.44                               | 4e-04 | .002  | -.46          | 0.023 | 62 |
| Rostral Anterior Cingulate R | alpha1    | -.36                               | .004  | .011  | -.41          | 0.045 | 62 |
| Caudal Anterior Cingulate R  | alpha1    | -.29                               | .020  | .041  | -.43          | 0.037 | 62 |

Full mutation males

| E: ADAMS Anxiety Scale (Higher is worse) |           | 2/45 (# Significant / Total Tests) |       |               |      |               |    |  |
|------------------------------------------|-----------|------------------------------------|-------|---------------|------|---------------|----|--|
| Full mutation males only                 |           |                                    |       | FDR Corrected |      | Age Corrected |    |  |
| Node                                     | Frequency | rho                                | p     | FDR p         | rho  | p             | n  |  |
| Parahippocampal L                        | alpha2    | -.64                               | 3e-04 | .015          | -.56 | 0.003         | 27 |  |
| Parahippocampal R                        | alpha2    | -.58                               | .002  | .037          | -.49 | 0.009         | 27 |  |

  

| F: ADAMS OCD Scale (Higher is worse) |           | 2/45 (# Significant / Total Tests) |      |               |      |               |    |  |
|--------------------------------------|-----------|------------------------------------|------|---------------|------|---------------|----|--|
| Full mutation males only             |           |                                    |      | FDR Corrected |      | Age Corrected |    |  |
| Node                                 | Frequency | rho                                | p    | FDR p         | rho  | p             | n  |  |
| Parahippocampal L                    | alpha1    | -.61                               | .001 | .034          | -.47 | 0.013         | 27 |  |
|                                      | alpha2    | -.58                               | .002 | .034          | -.44 | 0.023         | 27 |  |

**Table S10: Dorsal Attention Network**

**Higher Frequency Bands**

All FXS Subjects

| A: Non-verbal IQ (Higher is better) |           | 9/33 (# Significant / Total Tests) |       |               |      |               |    |  |
|-------------------------------------|-----------|------------------------------------|-------|---------------|------|---------------|----|--|
| All FXS subjects                    |           |                                    |       | FDR Corrected |      | Age Corrected |    |  |
| Node                                | Frequency | rho                                | p     | FDR p         | rho  | p             | n  |  |
| Inferior Temporal R                 | beta      | -.39                               | .002  | .010          | -.47 | 0.029         | 64 |  |
| Inferior Temporal L                 | gamma1    | -.40                               | .001  | .010          | -.43 | 0.049         | 64 |  |
| Inferior Temporal R                 | gamma1    | -.44                               | 3e-04 | .010          | -.48 | 0.025         | 64 |  |
| Middle Temporal R                   | gamma1    | -.38                               | .002  | .010          | -.46 | 0.031         | 64 |  |
| Inferior Temporal R                 | gamma2    | -.39                               | .002  | .010          | -.48 | 0.022         | 64 |  |
| Middle Temporal R                   | gamma2    | -.38                               | .002  | .010          | -.49 | 0.019         | 64 |  |

| A: Non-verbal IQ (Higher is better) |           |       |               |       |      |               | 9/33 (# Significant / Total Tests) |  |
|-------------------------------------|-----------|-------|---------------|-------|------|---------------|------------------------------------|--|
| All FXS subjects                    |           |       | FDR Corrected |       |      | Age Corrected |                                    |  |
| Node                                | Frequency | rho   | p             | FDR p | rho  | p             | n                                  |  |
| Middle Temporal L                   | gamma1    | - .35 | .004          | .015  | -.45 | 0.037         | 64                                 |  |
| Inferior Temporal L                 | gamma2    | - .36 | .004          | .015  | -.46 | 0.031         | 64                                 |  |
| Middle Temporal L                   | gamma2    | - .34 | .007          | .017  | -.48 | 0.024         | 64                                 |  |

#### Full Mutation Males

| B: Non-verbal IQ (Higher is better) |           |      |               |       |      |               | 7/33 (# Significant / Total Tests) |  |
|-------------------------------------|-----------|------|---------------|-------|------|---------------|------------------------------------|--|
| Full mutation males only            |           |      | FDR Corrected |       |      | Age Corrected |                                    |  |
| Node                                | Frequency | rho  | p             | FDR p | rho  | p             | n                                  |  |
| Inferior Temporal R                 | beta      | -.56 | .007          | .047  | -.47 | 0.029         | 22                                 |  |
| Inferior Temporal L                 | gamma1    | -.53 | .011          | .047  | -.43 | 0.049         | 22                                 |  |
| Inferior Temporal R                 | gamma1    | -.56 | .007          | .047  | -.48 | 0.025         | 22                                 |  |
| Middle Temporal L                   | gamma1    | -.55 | .008          | .047  | -.45 | 0.037         | 22                                 |  |
| Inferior Temporal L                 | gamma2    | -.57 | .005          | .047  | -.46 | 0.031         | 22                                 |  |
| Inferior Temporal R                 | gamma2    | -.55 | .008          | .047  | -.48 | 0.022         | 22                                 |  |
| Middle Temporal L                   | gamma2    | -.54 | .009          | .047  | -.48 | 0.024         | 22                                 |  |

#### Lower Frequency Bands

##### All FXS Subjects

| C: ADAMS OCD Scale (Higher is worse) |           |      |               |       |      |               | 2/33 (# Significant / Total Tests) |  |
|--------------------------------------|-----------|------|---------------|-------|------|---------------|------------------------------------|--|
| All FXS subjects                     |           |      | FDR Corrected |       |      | Age Corrected |                                    |  |
| Node                                 | Frequency | rho  | p             | FDR p | rho  | p             | n                                  |  |
| Inferior Temporal L                  | alpha1    | -.40 | .001          | .007  | -.50 | 0.008         | 64                                 |  |
| Middle Temporal L                    | alpha1    | -.40 | .001          | .007  | -.42 | 0.029         | 64                                 |  |



| D: Social Communication Questionnaire (Higher is worse) |           | 5/33 (# Significant / Total Tests) |      |       |               |       |    |
|---------------------------------------------------------|-----------|------------------------------------|------|-------|---------------|-------|----|
| All FXS subjects                                        |           | FDR Corrected                      |      |       | Age Corrected |       |    |
| Node                                                    | Frequency | rho                                | p    | FDR p | rho           | p     | n  |
| Pars Orbitalis R                                        | alpha1    | -.38                               | .002 | .011  | -.49          | 0.016 | 62 |
|                                                         | alpha2    | -.40                               | .001 | .011  | -.56          | 0.005 | 62 |
| Pars Triangularis R                                     | alpha1    | -.36                               | .004 | .013  | -.42          | 0.041 | 62 |
|                                                         | alpha2    | -.37                               | .003 | .013  | -.49          | 0.016 | 62 |
| Caudal Anterior Cingulate L                             | alpha1    | -.30                               | .019 | .038  | -.45          | 0.028 | 62 |

#### Full Mutation Males

| E: ADAMS Anxiety Scale (Higher is worse) |           | 2/33 (# Significant / Total Tests) |      |       |               |       |    |
|------------------------------------------|-----------|------------------------------------|------|-------|---------------|-------|----|
| Full mutation males only                 |           | FDR Corrected                      |      |       | Age Corrected |       |    |
| Node                                     | Frequency | rho                                | p    | FDR p | rho           | p     | n  |
| Inferior Temporal L                      | alpha2    | -.58                               | .001 | .045  | -.50          | 0.009 | 27 |
| Inferior Temporal R                      | alpha2    | -.53                               | .004 | .049  | -.47          | 0.014 | 27 |

  

| F: ADAMS OCD Scale (Higher is worse) |           | 1/33 (# Significant / Total Tests) |       |       |               |       |    |
|--------------------------------------|-----------|------------------------------------|-------|-------|---------------|-------|----|
| Full mutation males only             |           | FDR Corrected                      |       |       | Age Corrected |       |    |
| Node                                 | Frequency | rho                                | p     | FDR p | rho           | p     | n  |
| Inferior Temporal L                  | alpha1    | -.63                               | 5e-04 | .016  | -.50          | 0.008 | 27 |

**Table S11: Salience Network****Higher Frequency Bands**

All FXS Subjects

| A: Non-verbal IQ (Higher is better) |           | 3/24 (# Significant / Total Tests) |      |       |               |       |    |  |
|-------------------------------------|-----------|------------------------------------|------|-------|---------------|-------|----|--|
| All FXS subjects                    |           | FDR Corrected                      |      |       | Age Corrected |       |    |  |
| Node                                | Frequency | rho                                | p    | FDR p | rho           | p     | n  |  |
| Supramarginal L                     | gamma2    | -.40                               | .001 | .007  | -.43          | 0.045 | 64 |  |
|                                     | gamma1    | -.37                               | .002 | .008  | -.43          | 0.047 | 64 |  |
| Insula R                            | gamma2    | -.30                               | .015 | .023  | -.44          | 0.041 | 64 |  |

**Lower Frequency Bands**

| B: SCQ (Higher is worse) |           | 2/24 (# Significant / Total Tests) |      |       |               |       |    |  |
|--------------------------|-----------|------------------------------------|------|-------|---------------|-------|----|--|
| All FXS subjects         |           | FDR Corrected                      |      |       | Age Corrected |       |    |  |
| Node                     | Frequency | rho                                | p    | FDR p | rho           | p     | n  |  |
| Rostral Middle Frontal R | alpha2    | -.35                               | .005 | .017  | -.41          | 0.048 | 62 |  |
| Caudal Middle Frontal L  | alpha1    | -.31                               | .015 | .030  | -.45          | 0.027 | 62 |  |

**Sensory Network Clinical Correlations**

**Table S12: Auditory Network**

All FXS Subjects

| A: Non-verbal IQ (Higher is better) |           | 3/6 (# Significant / Total Tests) |      |       |               |       |    |
|-------------------------------------|-----------|-----------------------------------|------|-------|---------------|-------|----|
| All FXS subjects                    |           | FDR Corrected                     |      |       | Age Corrected |       |    |
| Node                                | Frequency | rho                               | p    | FDR p | rho           | p     | n  |
| Superior Temporal L                 | gamma1    | -.33                              | .008 | .015  | -.44          | 0.043 | 64 |
| Superior Temporal R                 | gamma2    | -.35                              | .004 | .015  | -.43          | 0.045 | 64 |
| Superior Temporal L                 | gamma2    | -.32                              | .011 | .017  | -.49          | 0.019 | 64 |

Full Mutation Males

| B: Non-verbal IQ (Higher is better) |           | 3/6 (# Significant / Total Tests) |      |       |               |       |    |
|-------------------------------------|-----------|-----------------------------------|------|-------|---------------|-------|----|
| Full mutation males only            |           | FDR Corrected                     |      |       | Age Corrected |       |    |
| Node                                | Frequency | rho                               | p    | FDR p | rho           | p     | n  |
| Superior Temporal L                 | gamma1    | -                                 | .018 | .034  | -.44          | 0.043 | 22 |
|                                     |           | .50                               |      |       |               |       |    |
| Superior Temporal L                 | gamma2    | -                                 | .014 | .034  | -.49          | 0.019 | 22 |
|                                     |           | .52                               |      |       |               |       |    |
| Superior Temporal R                 | gamma2    | -                                 | .022 | .034  | -.43          | 0.045 | 22 |
|                                     |           | .49                               |      |       |               |       |    |

**Table S13: Visual Network**

**Higher Frequency Bands**

All FXS Subjects

| A: Non-verbal IQ (Higher is better) |           | 11/24 (# Significant / Total Tests) |   |       |               |   |   |
|-------------------------------------|-----------|-------------------------------------|---|-------|---------------|---|---|
| All FXS subjects                    |           | FDR Corrected                       |   |       | Age Corrected |   |   |
| Node                                | Frequency | rho                                 | p | FDR p | rho           | p | n |

| A: Non-verbal IQ (Higher is better) |           |      |               |       |      |               | 11/24 (# Significant / Total Tests) |  |
|-------------------------------------|-----------|------|---------------|-------|------|---------------|-------------------------------------|--|
| All FXS subjects                    |           |      | FDR Corrected |       |      | Age Corrected |                                     |  |
| Node                                | Frequency | rho  | p             | FDR p | rho  | p             | n                                   |  |
| Fusiform R                          | beta      | -.42 | .001          | .002  | -.51 | 0.014         | 64                                  |  |
| Lingual R                           | beta      | -.43 | 4e-04         | .002  | -.45 | 0.035         | 64                                  |  |
| Lateral Occipital R                 | gamma1    | -.42 | .001          | .002  | -.49 | 0.020         | 64                                  |  |
| Lingual R                           | gamma1    | -.42 | .001          | .002  | -.50 | 0.019         | 64                                  |  |
| Fusiform L                          | gamma2    | -.38 | .002          | .004  | -.45 | 0.034         | 64                                  |  |
| Lateral Occipital R                 | gamma2    | -.33 | .008          | .013  | -.50 | 0.017         | 64                                  |  |
| Lingual R                           | gamma2    | -.33 | .008          | .013  | -.46 | 0.031         | 64                                  |  |
| Lingual L                           | gamma2    | -.28 | .024          | .034  | -.46 | 0.033         | 64                                  |  |
| Cuneus R                            | beta      | -.28 | .028          | .037  | -.46 | 0.032         | 64                                  |  |
|                                     | gamma1    | -.26 | .035          | .044  | -.44 | 0.039         | 64                                  |  |
| Cuneus L                            | beta      | -.26 | .038          | .046  | -.43 | 0.047         | 64                                  |  |

#### Full Mutation Males

| B: Non-verbal IQ (Higher is better) |           |      |               |       |      |               | 11/24 (# Significant / Total Tests) |  |
|-------------------------------------|-----------|------|---------------|-------|------|---------------|-------------------------------------|--|
| Full mutation males only            |           |      | FDR Corrected |       |      | Age Corrected |                                     |  |
| Node                                | Frequency | rho  | p             | FDR p | rho  | p             | n                                   |  |
| Cuneus R                            | beta      | -.61 | .003          | .011  | -.46 | 0.032         | 22                                  |  |
| Fusiform R                          | beta      | -.61 | .003          | .011  | -.51 | 0.014         | 22                                  |  |
| Lingual R                           | beta      | -.63 | .002          | .011  | -.45 | 0.035         | 22                                  |  |

| B: Non-verbal IQ (Higher is better) |           |      |      | 11/24 (# Significant / Total Tests) |      |               |    |
|-------------------------------------|-----------|------|------|-------------------------------------|------|---------------|----|
| Full mutation males only            |           |      |      | FDR Corrected                       |      | Age Corrected |    |
| Node                                | Frequency | rho  | p    | FDR p                               | rho  | p             | n  |
| Lateral Occipital R                 | gamma1    | -.64 | .001 | .011                                | -.49 | 0.020         | 22 |
|                                     | gamma2    | -.62 | .002 | .011                                | -.50 | 0.017         | 22 |
| Lingual R                           | gamma1    | -.60 | .003 | .012                                | -.50 | 0.019         | 22 |
| Cuneus L                            | beta      | -.56 | .007 | .017                                | -.43 | 0.047         | 22 |
| Lingual R                           | gamma2    | -.55 | .008 | .017                                | -.46 | 0.031         | 22 |
| Cuneus R                            | gamma1    | -.54 | .010 | .019                                | -.44 | 0.039         | 22 |
| Fusiform L                          | gamma2    | -.54 | .010 | .019                                | -.45 | 0.034         | 22 |
| Lingual L                           | gamma2    | -.49 | .021 | .028                                | -.46 | 0.033         | 22 |

| C: ADAMS Anxiety Scale (Higher is worse) |           |      |      | 2/24 (# Significant / Total Tests) |      |               |    |
|------------------------------------------|-----------|------|------|------------------------------------|------|---------------|----|
| Full mutation males only                 |           |      |      | FDR Corrected                      |      | Age Corrected |    |
| Node                                     | Frequency | rho  | p    | FDR p                              | rho  | p             | n  |
| Lingual L                                | beta      | -.58 | .001 | .033                               | -.57 | 0.002         | 27 |
| Lingual R                                | beta      | -.55 | .003 | .036                               | -.55 | 0.003         | 27 |

### Lower Frequency Bands

All FXS Subjects

| D: ADAMS OCD Scale (Higher is worse) |           |      |      | 4/24 (# Significant / Total Tests) |      |               |    |
|--------------------------------------|-----------|------|------|------------------------------------|------|---------------|----|
| All FXS subjects                     |           |      |      | FDR Corrected                      |      | Age Corrected |    |
| Node                                 | Frequency | rho  | p    | FDR p                              | rho  | p             | n  |
| Fusiform L                           | alpha1    | -.42 | .001 | .009                               | -.47 | 0.014         | 64 |
| Lingual R                            | alpha2    | -.36 | .004 | .010                               | -.43 | 0.027         | 64 |
| Fusiform L                           | alpha2    | -.35 | .005 | .011                               | -.41 | 0.034         | 64 |
| Lingual L                            | alpha2    | -.31 | .011 | .020                               | -.46 | 0.016         | 64 |

Full Mutation Males

| E: ADAMS Anxiety Scale (Higher is worse) |  |  |  | 8/24 (# Significant / Total Tests) |  |               |  |
|------------------------------------------|--|--|--|------------------------------------|--|---------------|--|
| Full mutation males only                 |  |  |  | FDR Corrected                      |  | Age Corrected |  |

| Node                | Frequency | rho  | p     | FDR p | rho  | p     | n  |
|---------------------|-----------|------|-------|-------|------|-------|----|
| Fusiform L          | alpha2    | -.63 | 4e-04 | .011  | -.56 | 0.002 | 27 |
| Fusiform R          | alpha2    | -.57 | .002  | .012  | -.54 | 0.004 | 27 |
| Lingual L           | alpha2    | -.58 | .002  | .012  | -.53 | 0.004 | 27 |
| Lingual R           | alpha2    | -.59 | .001  | .012  | -.56 | 0.002 | 27 |
| Cuneus R            | alpha2    | -.53 | .005  | .023  | -.45 | 0.019 | 27 |
| Lateral Occipital R | alpha2    | -.51 | .007  | .028  | -.45 | 0.019 | 27 |
| Fusiform R          | alpha1    | -.48 | .012  | .039  | -.39 | 0.041 | 27 |
| Cuneus L            | alpha2    | -.47 | .013  | .039  | -.48 | 0.012 | 27 |

F: ADAMS OCD Scale (Higher is worse) 4/24 (# Significant / Total Tests)

| Full mutation males only |           |      | FDR Corrected |       | Age Corrected |       |    |
|--------------------------|-----------|------|---------------|-------|---------------|-------|----|
| Node                     | Frequency | rho  | p             | FDR p | rho           | p     | n  |
| Fusiform L               | alpha1    | -.59 | .001          | .015  | -.47          | 0.014 | 27 |
| Lingual L                | alpha2    | -.59 | .001          | .015  | -.46          | 0.016 | 27 |
| Fusiform L               | alpha2    | -.56 | .002          | .016  | -.41          | 0.034 | 27 |
| Lingual R                | alpha2    | -.51 | .006          | .029  | -.43          | 0.027 | 27 |

**Table S14: Resting state networks and their cortical nodes as attributed in the Desikan-Killiany (DK) atlas.**

Abbreviations: RSN, resting state networks; AUD, Auditory; DAN, Dorsal Attention Network; DMN, Default Mode Network; SAN, Salience Affective Network; VIS, Visual Network. Abbr., Abbreviation; Cortex, Cortical Region (Side: L, Left; R, right; Cortices: F, frontal; L, lingula; O, occipital; P, parietal; PF, prefrontal; T, temporal; Vert, total number of vertices composing node.

| RSN                          | Node                        | Abbr.                    | Cortex  | MNI Centroid |     |     | Vert. |     |
|------------------------------|-----------------------------|--------------------------|---------|--------------|-----|-----|-------|-----|
|                              |                             |                          |         | x            | y   | z   |       |     |
|                              | Caudal Anterior Cingulate R | cACC R                   | RL      | 4            | 22  | 27  | 68    |     |
|                              | Isthmus Cingulate L         | iCC L                    | LL      | -7           | -45 | 18  | 81    |     |
|                              | Isthmus Cingulate R         | iCC R                    | RL      | 6            | -42 | 19  | 91    |     |
|                              | Lateral Orbitofrontal L     | LOF L                    | LPF     | -25          | 30  | -19 | 221   |     |
|                              | Lateral Orbitofrontal R     | LOF R                    | RPF     | 23           | 32  | -19 | 206   |     |
|                              | Medial Orbitofrontal L      | MOF L                    | LPF     | -7           | 33  | -17 | 155   |     |
|                              | Medial Orbitofrontal R      | MOF R                    | RPF     | 4            | 37  | -15 | 170   |     |
|                              | DMN                         | Parahippocampal L        | paraH L | LT           | -26 | -29 | -21   | 68  |
| Parahippocampal R            |                             | paraH R                  | RT      | 24           | -30 | -19 | 66    |     |
| Posterior Cingulate L        |                             | PCC L                    | LL      | -5           | -15 | 38  | 85    |     |
| Posterior Cingulate R        |                             | PCC R                    | RL      | 5            | -17 | 39  | 93    |     |
| Precuneus L                  |                             | PCUN L                   | LP      | -9           | -59 | 38  | 314   |     |
| Precuneus R                  |                             | PCUN R                   | RP      | 10           | -58 | 38  | 325   |     |
| Rostral Anterior Cingulate L |                             | rACC L                   | LL      | -5           | 39  | 1   | 78    |     |
| Rostral Anterior Cingulate R |                             | rACC R                   | RL      | 4            | 38  | 3   | 56    |     |
|                              | Caudal Middle Frontal L     | cMFG L                   | LF      | -37          | 11  | 47  | 224   |     |
|                              | Caudal Middle Frontal R     | cMFG R                   | RF      | 37           | 13  | 48  | 186   |     |
|                              | Insula L                    | INS L                    | LT      | -38          | -2  | 2   | 174   |     |
|                              | SAN                         | Insula R                 | INS R   | RT           | 36  | 2   | -2    | 196 |
|                              |                             | Rostral Middle Frontal L | rMFG L  | LF           | -34 | 47  | 17    | 543 |
|                              |                             | Rostral Middle Frontal R | rMFG R  | RF           | 34  | 48  | 17    | 551 |
|                              |                             | Supramarginal L          | SMAR L  | LP           | -57 | -38 | 34    | 305 |

| RSN   | Node                         | Abbr.   | Cortex | MNI Centroid |     |     | Vert. |
|-------|------------------------------|---------|--------|--------------|-----|-----|-------|
|       |                              |         |        | x            | y   | z   |       |
|       | Supramarginal R              | SMAR R  | RP     | 54           | -31 | 36  | 302   |
|       | Caudal Anterior Cingulate L  | cACC L  | LL     | -5           | 21  | 26  | 48    |
|       | Inferior Temporal L          | ITG L   | LT     | -53          | -36 | -22 | 307   |
|       | Inferior Temporal R          | ITG R   | RT     | 51           | -32 | -25 | 316   |
|       | Middle Temporal L            | MTG L   | LT     | -58          | -23 | -15 | 277   |
|       | Middle Temporal R            | MTG R   | RT     | 58           | -22 | -15 | 324   |
| DAN   | Pars Opercularis L           | pOPER L | LF     | -49          | 17  | 14  | 139   |
|       | Pars Opercularis R           | pOPER R | RF     | 49           | 17  | 14  | 118   |
|       | Pars Orbitalis L             | pORB L  | LPF    | -44          | 39  | -14 | 72    |
|       | Pars Orbitalis R             | pORB R  | RPF    | 43           | 42  | -15 | 68    |
|       | Pars Triangularis L          | pTRI L  | LF     | -47          | 32  | 1   | 101   |
|       | Pars Triangularis R          | pTRI R  | RF     | 48           | 34  | 2   | 148   |
| AUD   | Superior Temporal L          | STG L   | LT     | -55          | -12 | -4  | 290   |
|       | Superior Temporal R          | STG R   | RT     | 54           | -6  | -7  | 257   |
|       | Cuneus L                     | CUN L   | LO     | -6           | -80 | 19  | 93    |
|       | Cuneus R                     | CUN R   | RO     | 8            | -78 | 20  | 99    |
|       | Fusiform L                   | FUS L   | LT     | -36          | -43 | -22 | 268   |
|       | Fusiform R                   | FUS R   | RT     | 35           | -41 | -23 | 255   |
| VIS   | Lateral Occipital L          | LOG L   | LO     | -31          | -89 | 0   | 371   |
|       | Lateral Occipital R          | LOG R   | RO     | 35           | -85 | 2   | 367   |
|       | Lingual L                    | LING L  | LO     | -14          | -71 | -5  | 246   |
|       | Lingual R                    | LING R  | RO     | 13           | -67 | -4  | 227   |
|       | Banks of Sup. Temp. Sulcus L | BSTS L  | LT     | -53          | -45 | 8   | 76    |
|       | Banks of Sup. Temp. Sulcus R | BSTS R  | RT     | 54           | -41 | 10  | 70    |
| other | Entorhinal L                 | ENT L   | LT     | -26          | -5  | -33 | 30    |
|       | Entorhinal R                 | ENT R   | RT     | 23           | -6  | -35 | 32    |
|       | Frontal Pole L               | FP L    | LPF    | -7           | 68  | -11 | 22    |



| RSN | Node                  | Abbr.     | Cortex | MNI Centroid |     |     | Vert. |
|-----|-----------------------|-----------|--------|--------------|-----|-----|-------|
|     |                       |           |        | x            | y   | z   |       |
|     | Frontal Pole R        | FP R      | RPF    | 7            | 68  | -15 | 30    |
|     | Inferior Parietal L   | IPL L     | LP     | -42          | -71 | 32  | 351   |
|     | Inferior Parietal R   | IPL R     | RP     | 46           | -63 | 32  | 421   |
|     | Paracentral L         | paraC L   | LC     | -7           | -30 | 57  | 110   |
|     | Paracentral R         | paraC R   | RC     | 7            | -27 | 57  | 128   |
|     | Pericalcarine L       | periCAL L | LO     | -11          | -82 | 6   | 109   |
|     | Pericalcarine R       | periCAL R | RO     | 12           | -80 | 7   | 110   |
|     | Postcentral L         | postC L   | LC     | -46          | -22 | 45  | 333   |
|     | Postcentral R         | postC R   | RC     | 44           | -20 | 46  | 307   |
|     | Precentral L          | preC L    | LC     | -41          | -9  | 46  | 339   |
|     | Precentral R          | preC R    | RC     | 40           | -7  | 46  | 353   |
|     | Superior Frontal L    | sFG L     | LF     | -12          | 30  | 41  | 671   |
|     | Superior Frontal R    | sFG R     | RF     | 12           | 32  | 41  | 603   |
|     | Superior Parietal L   | SPL L     | LP     | -23          | -65 | 50  | 484   |
|     | Superior Parietal R   | SPL R     | RP     | 24           | -65 | 51  | 464   |
|     | Temporal Pole L       | TP L      | LT     | -28          | 14  | -38 | 38    |
|     | Temporal Pole R       | TP R      | RT     | 27           | 16  | -36 | 38    |
|     | Transverse Temporal L | TT L      | LT     | -46          | -23 | 10  | 34    |
|     | Transverse Temporal R | TT R      | RT     | 46           | -17 | 9   | 23    |

**Table S15: Regional classification of Desikan-Killiany (DK) Atlas Nodes**

| <b>Region</b> | <b>DK Atlas Node</b>         | <b>Region</b>       | <b>DK Atlas Node</b>         |
|---------------|------------------------------|---------------------|------------------------------|
| Central       | Paracentral L                | Temporal<br>(cont.) | Posterior Cingulate L        |
|               | Paracentral R                |                     | Posterior Cingulate R        |
|               | Postcentral L                |                     | Rostral Anterior Cingulate L |
|               | Postcentral R                |                     | Rostral Anterior Cingulate R |
|               | Precentral L                 |                     | Superior Temporal L          |
|               | Precentral R                 |                     | Superior Temporal R          |
| Frontal       | Caudal Middle Frontal L      |                     | Temporal Pole L              |
|               | Caudal Middle Frontal R      |                     | Temporal Pole R              |
|               | Pars Opercularis L           |                     | Transverse Temporal L        |
|               | Pars Opercularis R           |                     | Transverse Temporal R        |
|               | Pars Triangularis L          | Occipital           | Cuneus L                     |
|               | Pars Triangularis R          |                     | Cuneus R                     |
|               | Rostral Middle Frontal L     |                     | Lateral Occipital L          |
|               | Rostral Middle Frontal R     |                     | Lateral Occipital R          |
|               | Superior Frontal L           |                     | Lingual L                    |
|               | Superior Frontal R           |                     | Lingual R                    |
| Temporal      | Banks of Sup. Temp. Sulcus L |                     | Pericalcarine L              |
|               | Banks of Sup. Temp. Sulcus R |                     | Pericalcarine R              |
|               | Caudal Anterior Cingulate L  | Parietal            | Inferior Parietal L          |
|               | Caudal Anterior Cingulate R  |                     | Inferior Parietal R          |
|               | Entorhinal L                 |                     | Precuneus L                  |
|               | Entorhinal R                 |                     | Precuneus R                  |
|               | Fusiform L                   |                     | Superior Parietal L          |
|               | Fusiform R                   |                     | Superior Parietal R          |
|               | Inferior Temporal L          | Supramarginal L     |                              |
|               | Inferior Temporal R          | Supramarginal R     |                              |
| Insula L      | Left                         | Frontal Pole L      |                              |

| <b>Region</b> | <b>DK Atlas Node</b> | <b>Region</b> | <b>DK Atlas Node</b>    |
|---------------|----------------------|---------------|-------------------------|
|               | Insula R             | Prefrontal    | Lateral Orbitofrontal L |
|               | Isthmus Cingulate L  | Cortex        | Medial Orbitofrontal L  |
|               | Isthmus Cingulate R  |               | Pars Orbitalis L        |
|               | Middle Temporal L    | Right         | Frontal Pole R          |
|               | Middle Temporal R    | Prefrontal    | Lateral Orbitofrontal R |
|               | Parahippocampal L    | Cortex        | Medial Orbitofrontal R  |
|               | Parahippocampal R    |               | Pars Orbitalis R        |
